# Supplementary material for: MazF6 toxin of Mycobacterium tuberculosis demonstrates antitoxin specificity and is coupled to regulation of cell growth by a Soj-like protein
Source: PubMed Central journal article supplement (PMC3834876; doi:10.1186/1471-2180-13-240), 2013-10-31
Supplement: 1471-2180-13-240-S1.pdf [file 1471-2180-13-240-S1.pdf]

Additional file 2: Primer sequences used for plasmid construction

| Gene                     | Rv #           |         | Primer Sequence                        |
|--------------------------|----------------|---------|----------------------------------------|
| <i>soj<sub>Mtb</sub></i> | <i>rv1708</i>  | Forward | 5' - CTGGTACATATGTTGCCTGCGGGTCTCCC     |
|                          |                | Reverse | 5' - AAGCTCAAGCTTCATGCCAAATCGGTCGATC   |
| <i>mazE6</i>             | <i>rv1991a</i> | Forward | 5' - GGTCGCGGATCCATGAAGACAGCTATTTCTCTG |
|                          |                | Reverse | 5' - GTGGTGCTCGAGCCACTCATCGTCCATGGT    |
| <i>mazF6</i>             | <i>rv1991c</i> | Forward | 5' - CCCTTTGCATGCTCATGGTGATTAGTCGTG    |
|                          |                | Reverse | 5' - GGGTTTGC GGCCGCAAGGTCCAGTACGCG    |
| <i>mazE1</i>             | <i>rv0456b</i> | Forward | 5' - GGTCGCGGATCCATGACTACCTATTACTACG   |
|                          |                | Reverse | 5' - GTGGTGAAGCTTCCGCGCAGCATCTACG      |
| <i>mazE2</i>             | <i>rv0660c</i> | Forward | 5' - GGTCGCGGATCCATGCTCAGCTTCCGCGC     |
|                          |                | Reverse | 5' - GTGGTGAAGCTTCCGCGCCGCATCGGC       |
| <i>mazE3</i>             | <i>rv1103c</i> | Forward | 5' - GGTCGCGGATCCATGTACCTACCCTGGGG     |
|                          |                | Reverse | 5' - GTGGTGCTCGAGGTGATGTCGAGGGCG       |
| <i>mazE4</i>             | <i>rv1494</i>  | Forward | 5' - GGTCGCGGATCCATGCCGTTTCTGGTTGCATT  |
|                          |                | Reverse | 5' - GTGGTGCTCGAGCTGTGCCGAGCGCTGC      |
| <i>mazE5</i>             | <i>rv1943c</i> | Forward | 5' - GGTCGCGAATTCATGAAGACGGCCCGTTG     |
|                          |                | Reverse | 5' - GTGGTGCTCGAGCGAGTCTCCAGCCGCC      |
| <i>mazE7</i>             | <i>rv2063</i>  | Forward | 5' - GGTCGCGGATCCATGTCTACATCCACGACG    |
|                          |                | Reverse | 5' - GTGGTGAAGCTTGCCAAGGCCGTCGCC       |
| <i>mazE9</i>             | <i>rv2801a</i> | Forward | 5' - GGTCGCGGATCCATGAAGTTGAGCGTGAGC    |
|                          |                | Reverse | 5' - GTGGTGAAGCTTCCGCGGCCGCATCACC      |
