# Supplementary material for: MazF6 toxin of Mycobacterium tuberculosis demonstrates antitoxin specificity and is coupled to regulation of cell growth by a Soj-like protein
Source: PubMed Central journal article supplement (PMC3834876; doi:10.1186/1471-2180-13-240), 2013-10-31
Supplement: 1471-2180-13-240-S2.pdf [file 1471-2180-13-240-S2.pdf]

| <b>Rv Number</b> | <b>Gene</b> | <b>Classification</b>                   | <b>Ratio change over control</b> | <b>Direction</b> |
|------------------|-------------|-----------------------------------------|----------------------------------|------------------|
| RV0005           | gyrB        | information pathways                    | 5.34                             | Down             |
| RV0013           | pabA        | intermediary metabolism and respiration | 2.26                             | Up               |
| RV0014C          | pknB        | regulatory proteins                     | 2.66                             | Up               |
| RV0016C          | pbpA        | cell wall and cell processes            | 1.72                             | Up               |
| RV0017C          | rodA        | cell wall and cell processes            | 1.72                             | Up               |
| RV0021C          |             | conserved hypotheticals                 | 3.11                             | Up               |
| RV0022C          |             | conserved hypotheticals                 | 2.83                             | Up               |
| RV0024           |             | virulence, detoxification, adaptation   | 2.43                             | Up               |
| RV0026           |             | conserved hypotheticals                 | 1.55                             | Up               |
| RV0028           |             | unknown                                 | 1.68                             | Up               |
| RV0030           |             | unknown                                 | 2.55                             | Up               |
| RV0032           | bioF2       | intermediary metabolism and respiration | 2.55                             | Up               |
| RV0033           |             | lipid metabolism                        | 3.05                             | Up               |
| RV0034           |             | unknown                                 | 1.74                             | Up               |
| RV0035           | fadD34      | lipid metabolism                        | 2.17                             | Up               |
| RV0037C          |             | cell wall and cell processes            | 2.55                             | Up               |
| RV0039C          |             | conserved hypotheticals                 | 2.13                             | Up               |
| RV0041           | leuS        | information pathways                    | 2.42                             | Up               |
| RV0043C          |             | regulatory proteins                     | 2.12                             | Up               |
| RV0045C          |             | lipid metabolism                        | 2.62                             | Up               |
| RV0046C          |             | conserved hypotheticals                 | 1.98                             | Down             |
| RV0051           |             | cell wall and cell processes            | 1.69                             | Up               |
| RV0054           | ssb         | information pathways                    | 2.85                             | Down             |
| RV0057           |             | unknown                                 | 2.65                             | Down             |
| RV0062           | celA        | intermediary metabolism and respiration | 2.26                             | Up               |
| RV0064           |             | cell wall and cell processes            | 1.58                             | Up               |
| RV0068           |             | intermediary metabolism and respiration | 2.58                             | Up               |
| RV0069C          | sdaA        | intermediary metabolism and respiration | 1.7                              | Up               |
| RV0070C          | glyA2       | intermediary metabolism and respiration | 1.81                             | Up               |
| RV0075           |             | intermediary metabolism and respiration | 2.04                             | Up               |
| RV0076C          |             | cell wall and cell processes            | 1.67                             | Up               |
| RV0079           |             | unknown                                 | 2.3                              | Down             |
| RV0080           |             | unknown                                 | 1.81                             | Down             |
| RV0082           |             | intermediary metabolism and respiration | 2.95                             | Down             |
| RV0083           |             | intermediary metabolism and respiration | 9.78                             | Down             |
| RV0086           | hycQ        | intermediary metabolism and respiration | 1.89                             | Up               |
| RV0087           | hycE        | intermediary metabolism and respiration | 2.82                             | Up               |
| RV0089           |             | intermediary metabolism and respiration | 2.66                             | Up               |
| RV0091           |             | conserved hypotheticals                 | 3.42                             | Up               |
| RV0092           | ctpA        | cell wall and cell processes            | 2.88                             | Up               |
| RV0096           | PPE         | PE/PPE                                  | 3.21                             | Up               |
| RV0097           |             | conserved hypotheticals                 | 2.78                             | Up               |
| RV0099           | fadD10      | lipid metabolism                        | 2.28                             | Up               |
| RV0108C          |             | unknown                                 | 6.47                             | Down             |
| RV0109           | PE_PGRS     | PE/PPE                                  | 3.09                             | Up               |
| RV0111           |             | intermediary metabolism and respiration | 3.48                             | Up               |
| RV0115           |             | conserved hypotheticals                 | 2.95                             | Up               |
| RV0116C          |             | conserved hypotheticals                 | 1.89                             | Up               |

|         |       |                                         |      |      |
|---------|-------|-----------------------------------------|------|------|
| RV0117  | oxyS  | regulatory proteins                     | 3.25 | Up   |
| RV0118C | oxcA  | intermediary metabolism and respiration | 1.63 | Up   |
| RV0119  | fadD7 | lipid metabolism                        | 2.7  | Up   |
| RV0126  |       | intermediary metabolism and respiration | 2.1  | Up   |
| RV0133  |       | intermediary metabolism and respiration | 2.47 | Up   |
| RV0134  | ephF  | virulence, detoxification, adaptation   | 1.86 | Up   |
| RV0136  |       | intermediary metabolism and respiration | 2.67 | Up   |
| RV0137C |       | intermediary metabolism and respiration | 3.27 | Up   |
| RV0138  |       | conserved hypotheticals                 | 2.62 | Up   |
| RV0140  |       | conserved hypotheticals                 | 2.53 | Up   |
| RV0157  | pntB  | intermediary metabolism and respiration | 3.22 | Up   |
| RV0158  |       | regulatory proteins                     | 2.81 | Up   |
| RV0159C | PE    | PE/PPE                                  | 3.06 | Up   |
| RV0160C | PE    | PE/PPE                                  | 3.21 | Up   |
| RV0161  |       | intermediary metabolism and respiration | 3.18 | Up   |
| RV0162C | adhE  | intermediary metabolism and respiration | 2.66 | Up   |
| RV0180C |       | cell wall and cell processes            | 2.09 | Up   |
| RV0181C |       | conserved hypotheticals                 | 3.05 | Up   |
| RV0182C | sigG  | information pathways                    | 2.99 | Up   |
| RV0187  |       | intermediary metabolism and respiration | 3.02 | Up   |
| RV0191  |       | cell wall and cell processes            | 2.8  | Up   |
| RV0195  |       | regulatory proteins                     | 2.49 | Up   |
| RV0197  |       | conserved hypotheticals                 | 2.06 | Up   |
| RV0198C |       | intermediary metabolism and respiration | 1.82 | Up   |
| RV0199  |       | conserved hypotheticals                 | 2.18 | Up   |
| RV0205  |       | cell wall and cell processes            | 3.11 | Up   |
| RV0207C |       | conserved hypotheticals                 | 2.54 | Down |
| RV0210  |       | unknown                                 | 2.58 | Up   |
| RV0213C |       | intermediary metabolism and respiration | 2.76 | Up   |
| RV0218  |       | intermediary metabolism and respiration | 1.91 | Up   |
| RV0219  |       | unknown                                 | 2.34 | Up   |
| RV0220  | lipC  | intermediary metabolism and respiration | 1.67 | Down |
| RV0221  |       | conserved hypotheticals                 | 1.99 | Up   |
| RV0223C |       | intermediary metabolism and respiration | 2.47 | Up   |
| RV0226C |       | cell wall and cell processes            | 2.22 | Up   |
| RV0228  |       | intermediary metabolism and respiration | 3.26 | Up   |
| RV0229C |       | conserved hypotheticals                 | 1.62 | Up   |
| RV0230C |       | conserved hypotheticals                 | 2.3  | Up   |
| RV0235C |       | conserved hypotheticals                 | 3.09 | Up   |
| RV0236C |       | cell wall and cell processes            | 2.2  | Up   |
| RV0238  |       | regulatory proteins                     | 2.84 | Up   |
| RV0239  |       | conserved hypotheticals                 | 3.19 | Down |
| RV0250C |       | unknown                                 | 5.5  | Down |
| RV0251C | hsp   | virulence, detoxification, adaptation   | 3.47 | Down |
| RV0253  | nirD  | intermediary metabolism and respiration | 1.86 | Up   |
| RV0254C | cobU  | intermediary metabolism and respiration | 3.08 | Up   |
| RV0255C | cobQ  | intermediary metabolism and respiration | 2.4  | Up   |
| RV0257C |       | unknown                                 | 1.89 | Down |
| RV0258C |       | conserved hypotheticals                 | 3.29 | Up   |

|         |          |                                         |      |      |
|---------|----------|-----------------------------------------|------|------|
| RV0259C |          | conserved hypotheticals                 | 1.82 | Up   |
| RV0260C |          | conserved hypotheticals                 | 2.17 | Up   |
| RV0261C | narK3    | cell wall and cell processes            | 2.41 | Up   |
| RV0262C |          | intermediary metabolism and respiration | 1.82 | Up   |
| RV0263C |          | conserved hypotheticals                 | 1.67 | Up   |
| RV0265C | fecB2    | cell wall and cell processes            | 2.05 | Up   |
| RV0267  | narU     | cell wall and cell processes            | 2.13 | Up   |
| RV0269C |          | conserved hypotheticals                 | 2.33 | Up   |
| RV0271C | fadE6    | lipid metabolism                        | 2.32 | Up   |
| RV0277C |          | conserved hypotheticals                 | 1.75 | Up   |
| RV0278C | PE_PGERS | PE/PPE                                  | 2.24 | Up   |
| RV0282  |          | conserved hypotheticals                 | 3.57 | Down |
| RV0283  |          | conserved hypotheticals                 | 3.96 | Down |
| RV0285  | PE       | PE/PPE                                  | 1.92 | Down |
| RV0287  |          | regulatory proteins                     | 2.86 | Down |
| RV0288  |          | conserved hypotheticals                 | 3.12 | Down |
| RV0296C | atsG     | intermediary metabolism and respiration | 2.32 | Up   |
| RV0297  | PE_PGERS | PE/PPE                                  | 3.23 | Down |
| RV0298  |          | unknown                                 | 3.02 | Down |
| RV0305C | PPE      | PE/PPE                                  | 2.38 | Up   |
| RV0306  |          | intermediary metabolism and respiration | 2.37 | Up   |
| RV0307C |          | unknown                                 | 2.49 | Up   |
| RV0311  |          | unknown                                 | 2.94 | Up   |
| RV0313  |          | unknown                                 | 5.83 | Down |
| RV0317C | glpQ2    | intermediary metabolism and respiration | 1.76 | Down |
| RV0318C |          |                                         | 2.02 | Up   |
| RV0321  | dcd      | intermediary metabolism and respiration | 2.33 | Up   |
| RV0326  |          | unknown                                 | 2.73 | Up   |
| RV0327C |          | intermediary metabolism and respiration | 3.97 | Up   |
| RV0328  |          | regulatory proteins                     | 2.1  | Up   |
| RV0329C |          | conserved hypotheticals                 | 4.04 | Up   |
| RV0331  |          | intermediary metabolism and respiration | 2.6  | Up   |
| RV0335C | PE       | PE/PPE                                  | 2.16 | Up   |
| RV0338C |          | conserved hypotheticals                 | 2.12 | Up   |
| RV0340  |          | unknown                                 | 1.72 | Up   |
| RV0341  |          | conserved hypotheticals                 | 2.89 | Down |
| RV0344C | lpqJ     | cell wall and cell processes            | 1.91 | Up   |
| RV0349  |          | unknown                                 | 2.75 | Up   |
| RV0351  | grpE     | virulence, detoxification, adaptation   | 3.68 | Down |
| RV0352  | dnaJ     | virulence, detoxification, adaptation   | 3.86 | Down |
| RV0355C | PPE      | PE/PPE                                  | 2.58 | Up   |
| RV0356C |          | unknown                                 | 3.29 | Up   |
| RV0357C | purA     | intermediary metabolism and respiration | 2.27 | Up   |
| RV0358  |          | unknown                                 | 3.25 | Up   |
| RV0359  |          | conserved hypotheticals                 | 2.94 | Up   |
| RV0361  |          | cell wall and cell processes            | 2.13 | Up   |
| RV0368C |          | conserved hypotheticals                 | 2.86 | Up   |
| RV0371C |          | cell wall and cell processes            | 3.41 | Up   |
| RV0372C |          | conserved hypotheticals                 | 2.29 | Up   |

|         |         |                                         |       |      |
|---------|---------|-----------------------------------------|-------|------|
| RV0375C |         | intermediary metabolism and respiration | 2.72  | Up   |
| RV0376C |         | conserved hypotheticals                 | 2.27  | Up   |
| RV0377  |         | regulatory proteins                     | 2.56  | Up   |
| RV0378  |         | conserved hypotheticals                 | 2.08  | Up   |
| RV0393  |         | conserved hypotheticals                 | 2.54  | Up   |
| RV0394C |         | unknown                                 | 2.32  | Up   |
| RV0395  |         | unknown                                 | 2.57  | Up   |
| RV0396  |         | unknown                                 | 5.24  | Up   |
| RV0398C |         | unknown                                 | 2.66  | Up   |
| RV0399C | lpqK    | cell wall and cell processes            | 1.65  | Up   |
| RV0400C | fadE7   | lipid metabolism                        | 2.12  | Up   |
| RV0402C | mmpL1   | cell wall and cell processes            | 2.55  | Up   |
| RV0406C |         | conserved hypotheticals                 | 3.77  | Up   |
| RV0407  |         | intermediary metabolism and respiration | 2.33  | Up   |
| RV0408  | pta     | intermediary metabolism and respiration | 2.49  | Up   |
| RV0413  | mutT3   | information pathways                    | 4.08  | Down |
| RV0421C |         | unknown                                 | 2.36  | Up   |
| RV0427C | xthA    | information pathways                    | 2.06  | Up   |
| RV0428C |         | unknown                                 | 2.65  | Up   |
| RV0434  |         | conserved hypotheticals                 | 2.53  | Down |
| RV0442C | PPE     | PE/PPE                                  | 8.92  | Down |
| RV0446C |         | conserved hypotheticals                 | 2.49  | Up   |
| RV0448C |         | conserved hypotheticals                 | 1.84  | Up   |
| RV0449C |         | intermediary metabolism and respiration | 2.75  | Up   |
| RV0452  |         | regulatory proteins                     | 2.64  | Up   |
| RV0453  | PPE     | PE/PPE                                  | 3.22  | Up   |
| RV0454  |         | conserved hypotheticals                 | 3.35  | Up   |
| RV0456C | echA2   | lipid metabolism                        | 3.4   | Up   |
| RV0459  |         | conserved hypotheticals                 | 2.95  | Up   |
| RV0462  |         | intermediary metabolism and respiration | 1.91  | Up   |
| RV0463  |         | conserved hypotheticals                 | 5.35  | Down |
| RV0467  | aceA    | intermediary metabolism and respiration | 5.04  | Down |
| RV0471C |         | unknown                                 | 2.94  | Up   |
| RV0472C |         | regulatory proteins                     | 1.73  | Up   |
| RV0473  |         | cell wall and cell processes            | 1.84  | Up   |
| RV0480C |         | conserved hypotheticals                 | 2     | Up   |
| RV0492C |         | intermediary metabolism and respiration | 2.31  | Up   |
| RV0493C |         | conserved hypotheticals                 | 3.85  | Up   |
| RV0494  |         | regulatory proteins                     | 1.6   | Up   |
| RV0499  |         | unknown                                 | 3.29  | Up   |
| RV0500  | proC    | intermediary metabolism and respiration | 2.47  | Up   |
| RV0507  | mmpL2   | cell wall and cell processes            | 2.68  | Up   |
| RV0509  | hemA    | intermediary metabolism and respiration | 3.4   | Down |
| RV0510  | hemC    | intermediary metabolism and respiration | 4.69  | Down |
| RV0513  |         | cell wall and cell processes            | 2.42  | Down |
| RV0516C |         | conserved hypotheticals                 | 5.62  | Down |
| RV0518  |         | unknown                                 | 2.81  | Up   |
| RV0532  | PE_PGRS | PE/PPE                                  | 5.23  | Down |
| RV0535  | pnp     | intermediary metabolism and respiration | 11.17 | Down |

|         |          |                                         |      |      |
|---------|----------|-----------------------------------------|------|------|
| RV0536  | galE2    | intermediary metabolism and respiration | 6.61 | Down |
| RV0537C |          | cell wall and cell processes            | 1.75 | Up   |
| RV0541C |          | cell wall and cell processes            | 2.31 | Up   |
| RV0543C |          | conserved hypotheticals                 | 1.62 | Up   |
| RV0546C |          | conserved hypotheticals                 | 3.36 | Up   |
| RV0547C |          | intermediary metabolism and respiration | 2.95 | Up   |
| RV0548C | menB     | intermediary metabolism and respiration | 2.12 | Up   |
| RV0549C |          | conserved hypotheticals                 | 2.08 | Up   |
| RV0550C |          | unknown                                 | 2.02 | Up   |
| RV0551C | fadD8    | lipid metabolism                        | 3.71 | Up   |
| RV0552  |          | regulatory proteins                     | 2.08 | Up   |
| RV0561C |          | intermediary metabolism and respiration | 2.1  | Up   |
| RV0564C | gpdA1    | lipid metabolism                        | 1.69 | Up   |
| RV0565C |          | intermediary metabolism and respiration | 3.33 | Up   |
| RV0566C |          | conserved hypotheticals                 | 2.11 | Up   |
| RV0567  |          | intermediary metabolism and respiration | 2.73 | Up   |
| RV0571C |          | conserved hypotheticals                 | 3.04 | Up   |
| RV0573C |          | conserved hypotheticals                 | 3.15 | Up   |
| RV0574C |          | conserved hypotheticals                 | 2.68 | Up   |
| RV0575C |          | intermediary metabolism and respiration | 2.27 | Up   |
| RV0578C | PE_PGERS | PE/PPE                                  | 8.12 | Down |
| RV0585C |          | cell wall and cell processes            | 3.12 | Up   |
| RV0588  |          | virulence, detoxification, adaptation   | 1.5  | Up   |
| RV0590  |          | virulence, detoxification, adaptation   | 1.99 | Up   |
| RV0592  |          | virulence, detoxification, adaptation   | 2.83 | Up   |
| RV0595C |          | conserved hypotheticals                 | 3.34 | Up   |
| RV0596C |          | conserved hypotheticals                 | 2.3  | Up   |
| RV0597C |          | conserved hypotheticals                 | 2.82 | Up   |
| RV0600C |          | regulatory proteins                     | 3.42 | Up   |
| RV0601C |          | regulatory proteins                     | 2.13 | Up   |
| RV0603  |          | unknown                                 | 2.83 | Up   |
| RV0604  | lpqO     | cell wall and cell processes            | 2.96 | Up   |
| RV0614  |          | conserved hypotheticals                 | 2.93 | Up   |
| RV0615  |          | cell wall and cell processes            | 2.22 | Down |
| RV0616C |          | unknown                                 | 2.09 | Up   |
| RV0618  | galT'    | intermediary metabolism and respiration | 2.76 | Up   |
| RV0619  | galT     | intermediary metabolism and respiration | 2.97 | Up   |
| RV0620  | galK     | intermediary metabolism and respiration | 2.76 | Up   |
| RV0621  |          | cell wall and cell processes            | 2.87 | Up   |
| RV0622  |          | cell wall and cell processes            | 3.54 | Up   |
| RV0623  |          | conserved hypotheticals                 | 2.31 | Up   |
| RV0625C |          | cell wall and cell processes            | 2.38 | Up   |
| RV0630C | recB     | information pathways                    | 2.91 | Up   |
| RV0638  | secE     | cell wall and cell processes            | 3.51 | Down |
| RV0639  | nusG     | information pathways                    | 2.16 | Down |
| RV0641  | rplA     | information pathways                    | 2.66 | Down |
| RV0645C | mmaA1    | lipid metabolism                        | 3.38 | Up   |
| RV0647C |          | conserved hypotheticals                 | 2.65 | Up   |
| RV0648  |          | conserved hypotheticals                 | 2.47 | Up   |

|         |         |                                         |      |      |
|---------|---------|-----------------------------------------|------|------|
| RV0650  |         | regulatory proteins                     | 3.41 | Up   |
| RV0651  | rplJ    | information pathways                    | 3.33 | Up   |
| RV0652  | rplL    | information pathways                    | 1.83 | Up   |
| RV0653C |         | regulatory proteins                     | 2.7  | Up   |
| RV0655  |         | cell wall and cell processes            | 1.79 | Down |
| RV0658C |         | cell wall and cell processes            | 1.82 | Up   |
| RV0660C |         | conserved hypotheticals                 | 4.34 | Down |
| RV0661C |         | conserved hypotheticals                 | 3.16 | Up   |
| RV0663  | atsD    | intermediary metabolism and respiration | 3.14 | Up   |
| RV0665  |         | conserved hypotheticals                 | 2.57 | Up   |
| RV0667  | rpoB    | information pathways                    | 2.48 | Down |
| RV0668  | rpoC    | information pathways                    | 1.84 | Down |
| RV0669C |         | conserved hypotheticals                 | 2.41 | Up   |
| RV0671  | lpqP    | cell wall and cell processes            | 1.87 | Up   |
| RV0688  |         | intermediary metabolism and respiration | 2.48 | Up   |
| RV0692  |         | unknown                                 | 4.86 | Down |
| RV0702  | rplD    | information pathways                    | 3.15 | Down |
| RV0706  | rplV    | information pathways                    | 3.73 | Down |
| RV0707  | rpsC    | information pathways                    | 7.43 | Down |
| RV0712  |         | conserved hypotheticals                 | 2.31 | Up   |
| RV0713  |         | cell wall and cell processes            | 2.47 | Up   |
| RV0722  | rpmD    | information pathways                    | 2.02 | Down |
| RV0723  | rplO    | information pathways                    | 1.99 | Down |
| RV0727C | fucA    | intermediary metabolism and respiration | 2.49 | Up   |
| RV0731C |         | conserved hypotheticals                 | 2.61 | Up   |
| RV0732  | secY    | cell wall and cell processes            | 2.26 | Up   |
| RV0735  | sigL    | information pathways                    | 2.93 | Up   |
| RV0737  |         | regulatory proteins                     | 2.81 | Up   |
| RV0739  |         | conserved hypotheticals                 | 2.42 | Up   |
| RV0740  |         | conserved hypotheticals                 | 2.05 | Up   |
| RV0741  |         | insertion seqs and phages               | 2.27 | Up   |
| RV0742  | PE_PGRS | PE/PPE                                  | 5.96 | Down |
| RV0743C |         | unknown                                 | 2.41 | Up   |
| RV0746  | PE_PGRS | PE/PPE                                  | 2.54 | Up   |
| RV0748  |         | conserved hypotheticals                 | 3.94 | Down |
| RV0761C | adhB    | intermediary metabolism and respiration | 3.08 | Down |
| RV0762C |         | unknown                                 | 3.86 | Up   |
| RV0764C |         | intermediary metabolism and respiration | 2.76 | Up   |
| RV0765C |         | intermediary metabolism and respiration | 2.66 | Up   |
| RV0766C |         | intermediary metabolism and respiration | 3.35 | Up   |
| RV0767C |         | unknown                                 | 2.93 | Up   |
| RV0768  | aldA    | intermediary metabolism and respiration | 2.94 | Up   |
| RV0769  |         | intermediary metabolism and respiration | 2.22 | Up   |
| RV0772  | purD    | intermediary metabolism and respiration | 2.13 | Up   |
| RV0779C |         | conserved hypotheticals                 | 2.52 | Up   |
| RV0781  | ptrBb   | intermediary metabolism and respiration | 2.18 | Up   |
| RV0782  | ptrBa   | intermediary metabolism and respiration | 3.49 | Up   |
| RV0783C |         | cell wall and cell processes            | 3.5  | Up   |
| RV0784  |         | conserved hypotheticals                 | 2.76 | Up   |

|         |         |                                         |       |      |
|---------|---------|-----------------------------------------|-------|------|
| RV0794C | lpdB    | intermediary metabolism and respiration | 2.07  | Up   |
| RV0797  |         | insertion seqs and phages               | 2.89  | Up   |
| RV0807  |         | conserved hypotheticals                 | 2.21  | Up   |
| RV0811C |         | conserved hypotheticals                 | 2.01  | Up   |
| RV0812  | pabC    | intermediary metabolism and respiration | 2.35  | Up   |
| RV0813C |         | conserved hypotheticals                 | 1.96  | Up   |
| RV0816C | thiX    | intermediary metabolism and respiration | 2.35  | Up   |
| RV0817C |         | cell wall and cell processes            | 2.55  | Up   |
| RV0820  | phoT    | cell wall and cell processes            | 1.9   | Up   |
| RV0823C |         | regulatory proteins                     | 4.28  | Down |
| RV0824C | desA1   | lipid metabolism                        | 22.48 | Down |
| RV0830  |         | conserved hypotheticals                 | 2.66  | Up   |
| RV0838  | lpqR    | cell wall and cell processes            | 2.11  | Up   |
| RV0845  |         | regulatory proteins                     | 2.15  | Up   |
| RV0849  |         | cell wall and cell processes            | 2.07  | Up   |
| RV0850  |         | insertion seqs and phages               | 2.29  | Up   |
| RV0858C |         | intermediary metabolism and respiration | 2.89  | Up   |
| RV0872C | PE_PGRS | PE/PPE                                  | 14.79 | Down |
| RV0882  |         | cell wall and cell processes            | 2.19  | Up   |
| RV0883C |         | conserved hypotheticals                 | 2.56  | Up   |
| RV0884C | serC    | intermediary metabolism and respiration | 2.02  | Up   |
| RV0886  | fprB    | intermediary metabolism and respiration | 2.15  | Up   |
| RV0888  |         | cell wall and cell processes            | 1.64  | Up   |
| RV0894  |         | regulatory proteins                     | 2.29  | Up   |
| RV0901  |         | conserved hypotheticals                 | 2.34  | Up   |
| RV0902C |         | regulatory proteins                     | 1.92  | Up   |
| RV0903C |         | regulatory proteins                     | 1.76  | Up   |
| RV0905  | echA6   | lipid metabolism                        | 2.06  | Up   |
| RV0906  |         | cell wall and cell processes            | 2     | Up   |
| RV0907  |         | cell wall and cell processes            | 2.99  | Up   |
| RV0908  | ctpE    | cell wall and cell processes            | 2.2   | Up   |
| RV0912  |         | conserved hypotheticals                 | 2.07  | Up   |
| RV0920C |         | insertion seqs and phages               | 2.08  | Up   |
| RV0925C |         | unknown                                 | 1.87  | Up   |
| RV0927C |         | intermediary metabolism and respiration | 2.41  | Up   |
| RV0928  | phoS2   | cell wall and cell processes            | 3     | Up   |
| RV0929  | pstC2   | cell wall and cell processes            | 3.04  | Up   |
| RV0930  | pstA1   | cell wall and cell processes            | 3.03  | Up   |
| RV0932C | pstS    | cell wall and cell processes            | 1.86  | Down |
| RV0936  | pstA2   | cell wall and cell processes            | 2.35  | Up   |
| RV0942  |         | unknown                                 | 2.22  | Up   |
| RV0957  | purH    | intermediary metabolism and respiration | 2.04  | Up   |
| RV0963C |         | conserved hypotheticals                 | 2.97  | Up   |
| RV0964C |         | unknown                                 | 1.8   | Up   |
| RV0965C |         | conserved hypotheticals                 | 3.3   | Up   |
| RV0966C |         | conserved hypotheticals                 | 2.54  | Up   |
| RV0968  |         | conserved hypotheticals                 | 2     | Up   |
| RV0973C | accA2   | lipid metabolism                        | 2.35  | Up   |
| RV0975C | fadE13  | lipid metabolism                        | 4.15  | Up   |

|         |         |                                         |       |      |
|---------|---------|-----------------------------------------|-------|------|
| RV0976C |         | unknown                                 | 3.25  | Up   |
| RV0977  | PE_PGRS | PE/PPE                                  | 3.15  | Up   |
| RV0978C | PE_PGRS | PE/PPE                                  | 3.81  | Up   |
| RV0979C |         | unknown                                 | 4.56  | Up   |
| RV0980C | PE_PGRS | PE/PPE                                  | 3.74  | Up   |
| RV0982  |         | regulatory proteins                     | 3.9   | Up   |
| RV0983  |         | intermediary metabolism and respiration | 4.07  | Up   |
| RV0984  | moaB2   | intermediary metabolism and respiration | 3.25  | Up   |
| RV0985C | mscL    | cell wall and cell processes            | 2.66  | Up   |
| RV0986  |         | cell wall and cell processes            | 3.75  | Up   |
| RV0987  |         | cell wall and cell processes            | 3.56  | Up   |
| RV0988  |         | conserved hypotheticals                 | 3.04  | Up   |
| RV0990C |         | unknown                                 | 3.04  | Up   |
| RV0992C |         | conserved hypotheticals                 | 1.93  | Up   |
| RV1012  |         | unknown                                 | 2.3   | Up   |
| RV1013  | pks16   | lipid metabolism                        | 2.25  | Down |
| RV1016C | lpqT    | cell wall and cell processes            | 2.16  | Up   |
| RV1022  | lpqU    | cell wall and cell processes            | 3.12  | Up   |
| RV1023  | eno     | intermediary metabolism and respiration | 2.18  | Up   |
| RV1024  |         | unknown                                 | 1.76  | Up   |
| RV1025  |         | unknown                                 | 2.71  | Up   |
| RV1026  |         | virulence, detoxification, adaptation   | 2.72  | Up   |
| RV1027C | kdpE    | regulatory proteins                     | 3.33  | Up   |
| RV1030  | kdpB    | cell wall and cell processes            | 2.67  | Up   |
| RV1032C |         | regulatory proteins                     | 2.63  | Up   |
| RV1037C |         | conserved hypotheticals                 | 23.98 | Down |
| RV1038C |         | conserved hypotheticals                 | 40.12 | Down |
| RV1042C |         | insertion seqs and phages               | 5.84  | Down |
| RV1045  |         | unknown                                 | 2.06  | Up   |
| RV1046C |         | unknown                                 | 5.5   | Down |
| RV1049  |         | regulatory proteins                     | 2.61  | Up   |
| RV1051C |         | conserved hypotheticals                 | 3.21  | Up   |
| RV1052  |         | unknown                                 | 2.13  | Up   |
| RV1053C |         | unknown                                 | 3.45  | Up   |
| RV1055  |         | insertion seqs and phages               | 2.34  | Up   |
| RV1056  |         | conserved hypotheticals                 | 2.03  | Up   |
| RV1058  | fadD14  | lipid metabolism                        | 2.52  | Up   |
| RV1065  |         | conserved hypotheticals                 | 5.63  | Down |
| RV1069C |         | conserved hypotheticals                 | 3.36  | Up   |
| RV1072  |         | cell wall and cell processes            | 4.79  | Down |
| RV1075C |         | conserved hypotheticals                 | 2.77  | Up   |
| RV1076  | lipU    | intermediary metabolism and respiration | 2.59  | Down |
| RV1079  | metB    | intermediary metabolism and respiration | 2.44  | Up   |
| RV1080C | greA    | information pathways                    | 2.16  | Down |
| RV1090  |         | intermediary metabolism and respiration | 1.5   | Up   |
| RV1091  | PE_PGRS | PE/PPE                                  | 2.12  | Down |
| RV1094  | desA2   | lipid metabolism                        | 7.23  | Down |
| RV1099C |         | conserved hypotheticals                 | 2.74  | Up   |
| RV1105  |         | intermediary metabolism and respiration | 1.74  | Up   |



|         |        |                                         |       |      |
|---------|--------|-----------------------------------------|-------|------|
| RV1107C | xseB   | intermediary metabolism and respiration | 2.92  | Down |
| RV1109C |        | unknown                                 | 4.9   | Down |
| RV1110  | lytB'  | cell wall and cell processes            | 5.59  | Down |
| RV1118C |        | unknown                                 | 2.66  | Up   |
| RV1119C |        | unknown                                 | 3.21  | Up   |
| RV1120C |        | conserved hypotheticals                 | 3.07  | Up   |
| RV1121  | zwf    | intermediary metabolism and respiration | 2.05  | Up   |
| RV1123C | bpoB   | virulence, detoxification, adaptation   | 3.63  | Up   |
| RV1124  | ephC   | virulence, detoxification, adaptation   | 3.08  | Up   |
| RV1125  |        | unknown                                 | 3.55  | Up   |
| RV1128C |        | insertion seqs and phages               | 2.08  | Up   |
| RV1130  |        | conserved hypotheticals                 | 2.83  | Down |
| RV1131  | gltA1  | intermediary metabolism and respiration | 5.86  | Down |
| RV1132  |        | cell wall and cell processes            | 1.7   | Up   |
| RV1133C | metE   | intermediary metabolism and respiration | 10.33 | Down |
| RV1135C | PPE    | PE/PPE                                  | 9.42  | Down |
| RV1136  |        | lipid metabolism                        | 1.9   | Up   |
| RV1137C |        | unknown                                 | 1.86  | Up   |
| RV1138C |        | conserved hypotheticals                 | 1.83  | Up   |
| RV1141C | echA11 | lipid metabolism                        | 2.64  | Up   |
| RV1143  | mcr    | lipid metabolism                        | 2.52  | Up   |
| RV1144  |        | intermediary metabolism and respiration | 1.84  | Up   |
| RV1145  |        | cell wall and cell processes            | 3.64  | Up   |
| RV1146  |        | cell wall and cell processes            | 3.38  | Up   |
| RV1147  |        | intermediary metabolism and respiration | 2.5   | Up   |
| RV1148C |        | insertion seqs and phages               | 3.34  | Up   |
| RV1153C | omt    | lipid metabolism                        | 2.3   | Up   |
| RV1155  |        | unknown                                 | 1.67  | Down |
| RV1156  |        | unknown                                 | 2.66  | Down |
| RV1157C |        | conserved hypotheticals                 | 2.15  | Down |
| RV1158C |        | conserved hypotheticals                 | 2.31  | Down |
| RV1165  |        | conserved hypotheticals                 | 2.19  | Up   |
| RV1166  | lpqW   | cell wall and cell processes            | 2.08  | Up   |
| RV1171  |        | unknown                                 | 2.5   | Up   |
| RV1174C |        | unknown                                 | 4.15  | Down |
| RV1175C | fadH   | lipid metabolism                        | 2.04  | Up   |
| RV1176C |        | conserved hypotheticals                 | 1.78  | Up   |
| RV1177  | fdxC   | intermediary metabolism and respiration | 13.81 | Down |
| RV1178  |        | intermediary metabolism and respiration | 4.8   | Down |
| RV1179C |        | unknown                                 | 2.08  | Down |
| RV1184C |        | conserved hypotheticals                 | 3.48  | Down |
| RV1185C | fadD21 | lipid metabolism                        | 3.95  | Down |
| RV1189  | sigI   | information pathways                    | 2.35  | Up   |
| RV1190  |        | conserved hypotheticals                 | 2.41  | Up   |
| RV1195  | PE     | PE/PPE                                  | 11.36 | Down |
| RV1196  | PPE    | PE/PPE                                  | 13.43 | Down |
| RV1197  |        | conserved hypotheticals                 | 17.97 | Down |
| RV1198  |        | conserved hypotheticals                 | 9.73  | Down |
| RV1208  |        | conserved hypotheticals                 | 2.21  | Down |

|         |         |                                         |       |      |
|---------|---------|-----------------------------------------|-------|------|
| RV1209  |         | conserved hypotheticals                 | 2.92  | Down |
| RV1212C |         | cell wall and cell processes            | 1.58  | Up   |
| RV1216C |         | conserved hypotheticals                 | 2.17  | Up   |
| RV1220C |         | intermediary metabolism and respiration | 1.86  | Up   |
| RV1226C |         | cell wall and cell processes            | 4.85  | Down |
| RV1236  | sugA    | cell wall and cell processes            | 2.25  | Up   |
| RV1237  | sugB    | cell wall and cell processes            | 2.35  | Up   |
| RV1238  | sugC    | cell wall and cell processes            | 1.97  | Up   |
| RV1241  |         | conserved hypotheticals                 | 2.06  | Up   |
| RV1243C | PE_PGRS | PE/PPE                                  | 3.28  | Down |
| RV1244  | lpqZ    | cell wall and cell processes            | 2.17  | Up   |
| RV1246C |         | conserved hypotheticals                 | 2.25  | Up   |
| RV1248C | sucA    | intermediary metabolism and respiration | 1.66  | Up   |
| RV1261C |         | conserved hypotheticals                 | 1.96  | Up   |
| RV1263  | amiB2   | intermediary metabolism and respiration | 2.9   | Up   |
| RV1264  |         | intermediary metabolism and respiration | 2.13  | Up   |
| RV1267C | embR    | regulatory proteins                     | 2.47  | Up   |
| RV1268C |         | unknown                                 | 2.78  | Up   |
| RV1269C |         | conserved hypotheticals                 | 2.3   | Up   |
| RV1272C |         | cell wall and cell processes            | 2.81  | Up   |
| RV1286  | cysN    | intermediary metabolism and respiration | 1.64  | Up   |
| RV1289  |         | unknown                                 | 2.22  | Up   |
| RV1292  | argS    | information pathways                    | 2.67  | Up   |
| RV1297  | rho     | information pathways                    | 7.26  | Down |
| RV1300  | hemK    | intermediary metabolism and respiration | 2.72  | Down |
| RV1304  | atpB    | intermediary metabolism and respiration | 14.58 | Down |
| RV1306  | atpF    | intermediary metabolism and respiration | 9.66  | Down |
| RV1307  | atpH    | intermediary metabolism and respiration | 5.08  | Down |
| RV1308  | atpA    | intermediary metabolism and respiration | 7.68  | Down |
| RV1311  | atpC    | intermediary metabolism and respiration | 2.96  | Down |
| RV1314C |         | conserved hypotheticals                 | 2.05  | Up   |
| RV1316C | ogt     | information pathways                    | 2.14  | Up   |
| RV1318C |         | intermediary metabolism and respiration | 2.06  | Up   |
| RV1319C |         | intermediary metabolism and respiration | 1.83  | Up   |
| RV1320C |         | intermediary metabolism and respiration | 2.25  | Up   |
| RV1327C |         | intermediary metabolism and respiration | 4.56  | Down |
| RV1330C |         | conserved hypotheticals                 | 2.42  | Up   |
| RV1339  |         | conserved hypotheticals                 | 1.91  | Up   |
| RV1341  |         | conserved hypotheticals                 | 1.88  | Up   |
| RV1342C | pks14   | lipid metabolism                        | 2.71  | Up   |
| RV1349  |         | cell wall and cell processes            | 2.09  | Up   |
| RV1350  | fabG2   | lipid metabolism                        | 2.81  | Up   |
| RV1353C |         | regulatory proteins                     | 3.73  | Up   |
| RV1354C |         | conserved hypotheticals                 | 1.93  | Up   |
| RV1357C |         | conserved hypotheticals                 | 3.42  | Up   |
| RV1359  |         | regulatory proteins                     | 2.95  | Up   |
| RV1366  |         | unknown                                 | 2.79  | Up   |
| RV1369C |         | insertion seqs and phages               | 2.94  | Up   |
| RV1371  |         | unknown                                 | 2.49  | Up   |

|         |         |                                         |       |      |
|---------|---------|-----------------------------------------|-------|------|
| RV1374C |         | unknown                                 | 2.53  | Up   |
| RV1376  |         | conserved hypotheticals                 | 1.71  | Up   |
| RV1379  | pyrR    | regulatory proteins                     | 2.74  | Up   |
| RV1381  | pyrC    | intermediary metabolism and respiration | 3.11  | Up   |
| RV1385  | pyrF    | intermediary metabolism and respiration | 2.33  | Up   |
| RV1386  | PE      | PE/PPE                                  | 3.41  | Down |
| RV1387  | PPE     | PE/PPE                                  | 4.58  | Down |
| RV1389  | gmk     | intermediary metabolism and respiration | 1.74  | Down |
| RV1395  |         | regulatory proteins                     | 2.29  | Up   |
| RV1396C | PE_PGRS | PE/PPE                                  | 10.59 | Down |
| RV1397C |         | conserved hypotheticals                 | 3.87  | Down |
| RV1398C |         | conserved hypotheticals                 | 8.08  | Down |
| RV1404  |         | regulatory proteins                     | 3.04  | Down |
| RV1405C |         | intermediary metabolism and respiration | 1.83  | Up   |
| RV1411C | lprG    | cell wall and cell processes            | 1.57  | Down |
| RV1412  | ribC    | intermediary metabolism and respiration | 2.33  | Up   |
| RV1413  |         | unknown                                 | 2.28  | Up   |
| RV1414  |         | unknown                                 | 2.98  | Up   |
| RV1421  |         | conserved hypotheticals                 | 2.57  | Up   |
| RV1425  |         | conserved hypotheticals                 | 1.75  | Up   |
| RV1427C | fadD12  | lipid metabolism                        | 3.06  | Up   |
| RV1429  |         | conserved hypotheticals                 | 1.8   | Up   |
| RV1430  | PE      | PE/PPE                                  | 2.69  | Up   |
| RV1434  |         | unknown                                 | 2.54  | Up   |
| RV1439C |         | unknown                                 | 2.31  | Up   |
| RV1443C |         | unknown                                 | 1.53  | Up   |
| RV1445C | devB    | intermediary metabolism and respiration | 1.67  | Up   |
| RV1452C | PE_PGRS | PE/PPE                                  | 10.74 | Down |
| RV1455  |         | conserved hypotheticals                 | 3.31  | Up   |
| RV1457C |         | cell wall and cell processes            | 3.72  | Up   |
| RV1458C |         | cell wall and cell processes            | 2.19  | Up   |
| RV1469  | ctpD    | cell wall and cell processes            | 1.72  | Up   |
| RV1470  | trxA    | intermediary metabolism and respiration | 1.7   | Up   |
| RV1475C | acn     | intermediary metabolism and respiration | 2.51  | Down |
| RV1476  |         | unknown                                 | 1.61  | Up   |
| RV1482C |         | conserved hypotheticals                 | 2.66  | Up   |
| RV1485  | hemZ    | intermediary metabolism and respiration | 3.31  | Up   |
| RV1490  |         | cell wall and cell processes            | 2.21  | Up   |
| RV1492  | mutA    | lipid metabolism                        | 2.07  | Up   |
| RV1493  | mutB    | lipid metabolism                        | 1.77  | Up   |
| RV1499  |         | unknown                                 | 1.66  | Up   |
| RV1501  |         | conserved hypotheticals                 | 2.4   | Up   |
| RV1503C |         | conserved hypotheticals                 | 2.85  | Up   |
| RV1504C |         | conserved hypotheticals                 | 2.49  | Up   |
| RV1505C |         | conserved hypotheticals                 | 3.28  | Up   |
| RV1506C |         | unknown                                 | 3.07  | Up   |
| RV1507C |         | unknown                                 | 2.87  | Up   |
| RV1508C |         | cell wall and cell processes            | 2.08  | Up   |
| RV1509  |         | unknown                                 | 2.55  | Up   |

|         |          |                                         |       |      |
|---------|----------|-----------------------------------------|-------|------|
| RV1510  |          | cell wall and cell processes            | 2.95  | Up   |
| RV1511  | gmdA     | intermediary metabolism and respiration | 2.58  | Up   |
| RV1512  | epiA     | intermediary metabolism and respiration | 2.81  | Up   |
| RV1515C |          | conserved hypotheticals                 | 2.12  | Up   |
| RV1517  |          | conserved hypotheticals                 | 1.92  | Up   |
| RV1518  |          | cell wall and cell processes            | 1.83  | Down |
| RV1524  |          | intermediary metabolism and respiration | 1.56  | Up   |
| RV1528C | papA4    | lipid metabolism                        | 3.35  | Up   |
| RV1529  | fadD24   | lipid metabolism                        | 4.01  | Up   |
| RV1530  | adh      | intermediary metabolism and respiration | 2.71  | Up   |
| RV1543  |          | lipid metabolism                        | 3.09  | Down |
| RV1550  | fadD11   | lipid metabolism                        | 3.04  | Up   |
| RV1552  | frdA     | intermediary metabolism and respiration | 2.39  | Up   |
| RV1553  | frdB     | intermediary metabolism and respiration | 3.23  | Up   |
| RV1554  | frdC     | intermediary metabolism and respiration | 2.74  | Up   |
| RV1556  |          | regulatory proteins                     | 2.65  | Up   |
| RV1571  |          | conserved hypotheticals                 | 4.72  | Down |
| RV1573  |          | insertion seqs and phages               | 2.67  | Up   |
| RV1576C |          | insertion seqs and phages               | 1.71  | Up   |
| RV1577C |          | insertion seqs and phages               | 2.58  | Up   |
| RV1585C |          | insertion seqs and phages               | 1.77  | Down |
| RV1593C |          | conserved hypotheticals                 | 2.33  | Down |
| RV1594  | nadA     | intermediary metabolism and respiration | 10.46 | Down |
| RV1595  | nadB     | intermediary metabolism and respiration | 7.46  | Down |
| RV1597  |          | unknown                                 | 1.94  | Up   |
| RV1600  | hisC     | intermediary metabolism and respiration | 1.61  | Up   |
| RV1601  | hisB     | intermediary metabolism and respiration | 1.9   | Up   |
| RV1602  | hisH     | intermediary metabolism and respiration | 1.72  | Up   |
| RV1606  | hisI2    | intermediary metabolism and respiration | 1.8   | Up   |
| RV1607  | chaA     | cell wall and cell processes            | 2.53  | Up   |
| RV1613  | trpA     | intermediary metabolism and respiration | 2.78  | Down |
| RV1619  |          | conserved hypotheticals                 | 1.71  | Up   |
| RV1620C | cydC     | intermediary metabolism and respiration | 3.43  | Down |
| RV1625C |          | intermediary metabolism and respiration | 2.43  | Up   |
| RV1629  | polA     | information pathways                    | 1.98  | Up   |
| RV1632C |          | unknown                                 | 1.65  | Up   |
| RV1639C |          | conserved hypotheticals                 | 5.86  | Down |
| RV1642  | rpmI     | information pathways                    | 10.61 | Down |
| RV1643  | rplT     | information pathways                    | 7.79  | Down |
| RV1647  |          | conserved hypotheticals                 | 2.06  | Up   |
| RV1651C | PE_PGERS | PE/PPE                                  | 2.21  | Up   |
| RV1652  | argC     | intermediary metabolism and respiration | 2.63  | Up   |
| RV1656  | argF     | intermediary metabolism and respiration | 2.35  | Up   |
| RV1674C |          | regulatory proteins                     | 1.99  | Up   |
| RV1680  |          | unknown                                 | 1.58  | Up   |
| RV1684  |          | conserved hypotheticals                 | 2.41  | Up   |
| RV1685C |          | conserved hypotheticals                 | 2.3   | Up   |
| RV1694  | tlyA     | virulence, detoxification, adaptation   | 1.61  | Up   |
| RV1695  |          | conserved hypotheticals                 | 2.57  | Up   |

|         |         |                                         |       |      |
|---------|---------|-----------------------------------------|-------|------|
| RV1696  | recN    | information pathways                    | 2.56  | Up   |
| RV1699  | pyrG    | intermediary metabolism and respiration | 2.2   | Up   |
| RV1702C |         | insertion seqs and phages               | 2.35  | Up   |
| RV1717  |         | conserved hypotheticals                 | 2.29  | Up   |
| RV1718  |         | conserved hypotheticals                 | 2.22  | Up   |
| RV1719  |         | regulatory proteins                     | 2.01  | Up   |
| RV1720C |         | conserved hypotheticals                 | 2.74  | Up   |
| RV1721C |         | unknown                                 | 2.13  | Up   |
| RV1727  |         | conserved hypotheticals                 | 2.43  | Up   |
| RV1729C |         | conserved hypotheticals                 | 3.54  | Up   |
| RV1738  |         | conserved hypotheticals                 | 6.74  | Down |
| RV1741  |         | conserved hypotheticals                 | 2.09  | Up   |
| RV1745C |         | conserved hypotheticals                 | 3.07  | Up   |
| RV1746  | pknF    | regulatory proteins                     | 2.48  | Up   |
| RV1747  |         | cell wall and cell processes            | 2.12  | Up   |
| RV1748  |         | unknown                                 | 2.16  | Down |
| RV1749C |         | cell wall and cell processes            | 2.94  | Up   |
| RV1751  |         | intermediary metabolism and respiration | 2.94  | Up   |
| RV1753C | PPE     | PE/PPE                                  | 1.9   | Up   |
| RV1755C | plcD    | intermediary metabolism and respiration | 3.3   | Up   |
| RV1760  |         | conserved hypotheticals                 | 1.91  | Up   |
| RV1761C |         | unknown                                 | 2.44  | Up   |
| RV1767  |         | conserved hypotheticals                 | 2.38  | Up   |
| RV1769  |         | unknown                                 | 3.45  | Up   |
| RV1773C |         | regulatory proteins                     | 1.97  | Up   |
| RV1774  |         | intermediary metabolism and respiration | 1.96  | Up   |
| RV1776C |         | regulatory proteins                     | 2.39  | Up   |
| RV1779C |         | cell wall and cell processes            | 2.23  | Up   |
| RV1786  |         | intermediary metabolism and respiration | 1.91  | Up   |
| RV1792  |         | conserved hypotheticals                 | 29.36 | Down |
| RV1793  |         | conserved hypotheticals                 | 12.37 | Down |
| RV1796  |         | conserved hypotheticals                 | 2.79  | Down |
| RV1800  | PPE     | PE/PPE                                  | 2.74  | Up   |
| RV1801  | PPE     | PE/PPE                                  | 3.37  | Up   |
| RV1802  | PPE     | PE/PPE                                  | 2.72  | Up   |
| RV1803C | PE_PGRS | PE/PPE                                  | 3.53  | Up   |
| RV1806  | PE      | PE/PPE                                  | 1.92  | Up   |
| RV1807  | PPE     | PE/PPE                                  | 3.2   | Up   |
| RV1814  |         | lipid metabolism                        | 2.85  | Up   |
| RV1816  |         | regulatory proteins                     | 2.43  | Up   |
| RV1817  |         | intermediary metabolism and respiration | 2.6   | Up   |
| RV1818C | PE_PGRS | PE/PPE                                  | 1.96  | Down |
| RV1819C |         | cell wall and cell processes            | 2.62  | Up   |
| RV1823  |         | conserved hypotheticals                 | 3.06  | Up   |
| RV1824  |         | cell wall and cell processes            | 2.46  | Up   |
| RV1827  |         | conserved hypotheticals                 | 5.49  | Down |
| RV1828  |         | conserved hypotheticals                 | 2.76  | Down |
| RV1829  |         | conserved hypotheticals                 | 2.08  | Down |
| RV1831  |         | unknown                                 | 4.58  | Down |

|         |        |                                         |      |      |
|---------|--------|-----------------------------------------|------|------|
| RV1837C | glcB   | intermediary metabolism and respiration | 2.58 | Down |
| RV1839C |        | conserved hypotheticals                 | 2.04 | Up   |
| RV1842C |        | cell wall and cell processes            | 4.46 | Down |
| RV1846C |        | regulatory proteins                     | 3.24 | Down |
| RV1852  | ureG   | intermediary metabolism and respiration | 2.04 | Up   |
| RV1853  | ureD   | intermediary metabolism and respiration | 2.19 | Down |
| RV1854C | ndh    | intermediary metabolism and respiration | 2.45 | Up   |
| RV1861  |        | unknown                                 | 2.49 | Up   |
| RV1862  | adhA   | intermediary metabolism and respiration | 2.41 | Up   |
| RV1864C |        | conserved hypotheticals                 | 2.61 | Up   |
| RV1865C |        | intermediary metabolism and respiration | 3.08 | Up   |
| RV1866  |        | conserved hypotheticals                 | 3.72 | Up   |
| RV1867  |        | lipid metabolism                        | 3.34 | Up   |
| RV1868  |        | conserved hypotheticals                 | 2.51 | Up   |
| RV1870C |        | unknown                                 | 4.14 | Down |
| RV1871C |        | unknown                                 | 5.87 | Down |
| RV1872C | lldD2  | intermediary metabolism and respiration | 7.22 | Down |
| RV1879  |        | conserved hypotheticals                 | 2.32 | Up   |
| RV1884C |        | conserved hypotheticals                 | 3.58 | Down |
| RV1889C |        | conserved hypotheticals                 | 2.3  | Up   |
| RV1890C |        | unknown                                 | 1.97 | Up   |
| RV1895  |        | intermediary metabolism and respiration | 3.05 | Up   |
| RV1896C |        | conserved hypotheticals                 | 2.62 | Up   |
| RV1899C | lppD   | cell wall and cell processes            | 2.33 | Up   |
| RV1902C | nanT   | cell wall and cell processes            | 2.94 | Up   |
| RV1903  |        | cell wall and cell processes            | 2.6  | Up   |
| RV1910C |        | cell wall and cell processes            | 1.78 | Up   |
| RV1912C | fadB5  | lipid metabolism                        | 2.15 | Up   |
| RV1913  |        | unknown                                 | 3.65 | Up   |
| RV1914C |        | unknown                                 | 2.04 | Up   |
| RV1917C | PPE    | PE/PPE                                  | 3.91 | Up   |
| RV1925  | fadD31 | lipid metabolism                        | 8.25 | Down |
| RV1927  |        | unknown                                 | 8.13 | Down |
| RV1932  | tpx    | virulence, detoxification, adaptation   | 2.67 | Down |
| RV1933C | fadE18 | lipid metabolism                        | 3.11 | Up   |
| RV1936  |        | intermediary metabolism and respiration | 3.32 | Up   |
| RV1939  |        | intermediary metabolism and respiration | 2.65 | Up   |
| RV1940  | ribA   | intermediary metabolism and respiration | 1.89 | Up   |
| RV1941  |        | intermediary metabolism and respiration | 2.66 | Up   |
| RV1955  |        | unknown                                 | 3.57 | Down |
| RV1956  |        | regulatory proteins                     | 2.59 | Down |
| RV1957  |        | unknown                                 | 5.26 | Down |
| RV1958C |        | unknown                                 | 1.62 | Up   |
| RV1961  |        | unknown                                 | 3.02 | Up   |
| RV1963C |        | regulatory proteins                     | 2.68 | Up   |
| RV1966  | mce3   | virulence, detoxification, adaptation   | 3.14 | Up   |
| RV1967  |        | virulence, detoxification, adaptation   | 1.81 | Up   |
| RV1968  |        | virulence, detoxification, adaptation   | 3.46 | Up   |
| RV1970  | lprM   | cell wall and cell processes            | 2.23 | Up   |

|         |         |                                         |       |      |
|---------|---------|-----------------------------------------|-------|------|
| RV1971  |         | virulence, detoxification, adaptation   | 1.83  | Up   |
| RV1980C | mpt64   | cell wall and cell processes            | 1.78  | Down |
| RV1981C | nrdF    | intermediary metabolism and respiration | 3.7   | Up   |
| RV1983  | PE_PGRS | PE/PPE                                  | 3.24  | Up   |
| RV1984C |         | cell wall and cell processes            | 1.78  | Up   |
| RV1985C |         | regulatory proteins                     | 2.78  | Up   |
| RV1986  |         | cell wall and cell processes            | 1.98  | Up   |
| RV1987  |         | cell wall and cell processes            | 2.77  | Down |
| RV1988  |         | intermediary metabolism and respiration | 2.68  | Up   |
| RV1991C |         | conserved hypotheticals                 | 20.72 | Up   |
| RV1993C |         | conserved hypotheticals                 | 3.31  | Down |
| RV1999C |         | cell wall and cell processes            | 2.04  | Up   |
| RV2000  |         | unknown                                 | 1.6   | Up   |
| RV2004C |         | unknown                                 | 7.58  | Down |
| RV2007C | fdxA    | intermediary metabolism and respiration | 4.01  | Down |
| RV2010  |         | conserved hypotheticals                 | 2.06  | Down |
| RV2012  |         | unknown                                 | 2.14  | Up   |
| RV2014  |         | insertion seqs and phages               | 1.71  | Up   |
| RV2020C |         | unknown                                 | 2.55  | Down |
| RV2023C |         | unknown                                 | 3.54  | Down |
| RV2028C |         | conserved hypotheticals                 | 4.59  | Down |
| RV2029C | pfkB    | intermediary metabolism and respiration | 4.4   | Down |
| RV2030C |         | conserved hypotheticals                 | 5.01  | Down |
| RV2031C | hspX    | virulence, detoxification, adaptation   | 8.07  | Down |
| RV2038C |         | cell wall and cell processes            | 2.58  | Up   |
| RV2040C |         | cell wall and cell processes            | 2.41  | Up   |
| RV2053C |         | conserved hypotheticals                 | 2.34  | Down |
| RV2058C | rpmB2   | information pathways                    | 1.96  | Up   |
| RV2059  |         | conserved hypotheticals                 | 2.24  | Up   |
| RV2060  |         | conserved hypotheticals                 | 2.79  | Up   |
| RV2062C | cobN    | intermediary metabolism and respiration | 1.79  | Up   |
| RV2064  | cobG    | intermediary metabolism and respiration | 2.38  | Up   |
| RV2071C | cobM    | intermediary metabolism and respiration | 2.12  | Up   |
| RV2072C | cobL    | intermediary metabolism and respiration | 1.82  | Up   |
| RV2077C |         | conserved hypotheticals                 | 4.44  | Down |
| RV2078  |         | unknown                                 | 3.8   | Up   |
| RV2080  | lppJ    | cell wall and cell processes            | 2.45  | Up   |
| RV2084  |         | unknown                                 | 2.14  | Up   |
| RV2085  |         | insertion seqs and phages               | 2.86  | Up   |
| RV2088  | pknJ    | regulatory proteins                     | 3.26  | Up   |
| RV2089C | pepE    | intermediary metabolism and respiration | 1.99  | Up   |
| RV2091C |         | cell wall and cell processes            | 3.26  | Down |
| RV2094C |         | conserved hypotheticals                 | 8.07  | Down |
| RV2106  |         | insertion seqs and phages               | 3.26  | Up   |
| RV2108  | PPE     | PE/PPE                                  | 3.06  | Up   |
| RV2109C | prcA    | intermediary metabolism and respiration | 1.85  | Up   |
| RV2121C | hisG    | intermediary metabolism and respiration | 3.83  | Up   |
| RV2126C | PE_PGRS | PE/PPE                                  | 7.32  | Down |
| RV2128  |         | unknown                                 | 1.66  | Up   |

|         |         |                                         |      |      |
|---------|---------|-----------------------------------------|------|------|
| RV2129C |         | intermediary metabolism and respiration | 2.21 | Up   |
| RV2132  |         | conserved hypotheticals                 | 1.89 | Up   |
| RV2134C |         | conserved hypotheticals                 | 2.41 | Down |
| RV2135C |         | conserved hypotheticals                 | 2    | Up   |
| RV2143  |         | conserved hypotheticals                 | 3.04 | Up   |
| RV2147C |         | unknown                                 | 2.24 | Up   |
| RV2159C |         | unknown                                 | 2.71 | Down |
| RV2160C |         | unknown                                 | 9.55 | Down |
| RV2161C |         | intermediary metabolism and respiration | 3.41 | Down |
| RV2162C | PE_PGRS | PE/PPE                                  | 6.93 | Down |
| RV2163C | pbpB    | cell wall and cell processes            | 1.6  | Up   |
| RV2164C |         | unknown                                 | 1.72 | Down |
| RV2166C |         | conserved hypotheticals                 | 3.58 | Up   |
| RV2167C |         | insertion seqs and phages               | 3.43 | Up   |
| RV2172C |         | unknown                                 | 2.29 | Down |
| RV2178C | aroG    | intermediary metabolism and respiration | 1.95 | Up   |
| RV2179C |         | unknown                                 | 3.19 | Up   |
| RV2180C |         | cell wall and cell processes            | 3.71 | Up   |
| RV2183C |         | unknown                                 | 2.11 | Up   |
| RV2193  | ctaE    | intermediary metabolism and respiration | 1.52 | Down |
| RV2201  | asnB    | intermediary metabolism and respiration | 2.58 | Up   |
| RV2203  |         | unknown                                 | 2.63 | Up   |
| RV2204C |         | conserved hypotheticals                 | 2.85 | Down |
| RV2207  | cobT    | intermediary metabolism and respiration | 2.49 | Up   |
| RV2208  | cobS    | intermediary metabolism and respiration | 1.99 | Up   |
| RV2211C | gcvT    | intermediary metabolism and respiration | 2.24 | Up   |
| RV2223C |         | cell wall and cell processes            | 2.17 | Up   |
| RV2225  | panB    | intermediary metabolism and respiration | 2.43 | Up   |
| RV2226  |         | unknown                                 | 2.34 | Up   |
| RV2227  |         | unknown                                 | 1.71 | Up   |
| RV2228C |         | unknown                                 | 2.06 | Up   |
| RV2230C |         | conserved hypotheticals                 | 2.99 | Up   |
| RV2231C | cobC    | intermediary metabolism and respiration | 1.52 | Up   |
| RV2232  |         | unknown                                 | 3.27 | Up   |
| RV2235  |         | unknown                                 | 1.66 | Up   |
| RV2236C | cobD    | intermediary metabolism and respiration | 2.21 | Up   |
| RV2240C |         | conserved hypotheticals                 | 2.55 | Up   |
| RV2241  | aceE    | intermediary metabolism and respiration | 4.31 | Down |
| RV2242  |         | unknown                                 | 2.64 | Up   |
| RV2244  | acpM    | lipid metabolism                        | 3.65 | Down |
| RV2245  | kasA    | lipid metabolism                        | 3.64 | Down |
| RV2246  | kasB    | lipid metabolism                        | 7.47 | Down |
| RV2248  |         | conserved hypotheticals                 | 2.78 | Up   |
| RV2252  |         | conserved hypotheticals                 | 3.22 | Up   |
| RV2254C |         | unknown                                 | 2.4  | Up   |
| RV2256C |         | conserved hypotheticals                 | 2.99 | Down |
| RV2265  |         | cell wall and cell processes            | 2.47 | Up   |
| RV2267C |         | unknown                                 | 2.41 | Up   |
| RV2269C |         | unknown                                 | 3.23 | Up   |



|         |       |                                         |       |      |
|---------|-------|-----------------------------------------|-------|------|
| RV2274C |       | unknown                                 | 3.14  | Up   |
| RV2275  |       | unknown                                 | 3.57  | Up   |
| RV2277C |       | intermediary metabolism and respiration | 4.22  | Up   |
| RV2279  |       | insertion seqs and phages               | 3.31  | Up   |
| RV2282C |       | regulatory proteins                     | 2.78  | Up   |
| RV2287  | yjcE  | cell wall and cell processes            | 10.38 | Down |
| RV2293C |       | unknown                                 | 2.68  | Up   |
| RV2294  |       | intermediary metabolism and respiration | 2.91  | Up   |
| RV2296  |       | intermediary metabolism and respiration | 2.23  | Up   |
| RV2299C | htpG  | virulence, detoxification, adaptation   | 2.14  | Up   |
| RV2300C |       | conserved hypotheticals                 | 3.04  | Up   |
| RV2301  |       | cell wall and cell processes            | 1.74  | Up   |
| RV2303C |       | intermediary metabolism and respiration | 2.63  | Up   |
| RV2304C |       | unknown                                 | 2.4   | Up   |
| RV2309C |       | insertion seqs and phages               | 1.68  | Down |
| RV2317  | uspE  | cell wall and cell processes            | 3.71  | Up   |
| RV2318  | uspC  | cell wall and cell processes            | 3.1   | Up   |
| RV2319C |       | unknown                                 | 3.59  | Up   |
| RV2320C | rocE  | cell wall and cell processes            | 2.63  | Up   |
| RV2321C | rocD2 | intermediary metabolism and respiration | 3.49  | Up   |
| RV2322C | rocD1 | intermediary metabolism and respiration | 2.79  | Up   |
| RV2323C |       | conserved hypotheticals                 | 2.61  | Up   |
| RV2324  |       | regulatory proteins                     | 2.22  | Up   |
| RV2329C | narK1 | cell wall and cell processes            | 2.01  | Down |
| RV2330C | lppP  | cell wall and cell processes            | 2.5   | Up   |
| RV2335  | cysE  | intermediary metabolism and respiration | 1.74  | Down |
| RV2337C |       | unknown                                 | 1.5   | Up   |
| RV2340C | PE    | PE/PPE                                  | 1.98  | Up   |
| RV2341  | lppQ  | cell wall and cell processes            | 3.26  | Up   |
| RV2343C | dnaG  | information pathways                    | 3.15  | Up   |
| RV2346C |       | conserved hypotheticals                 | 10.53 | Down |
| RV2347C |       | conserved hypotheticals                 | 13.12 | Down |
| RV2348C |       | unknown                                 | 6.96  | Down |
| RV2349C | plcC  | intermediary metabolism and respiration | 1.78  | Up   |
| RV2350C | plcB  | intermediary metabolism and respiration | 1.86  | Up   |
| RV2351C | plcA  | intermediary metabolism and respiration | 3.03  | Up   |
| RV2355  |       | insertion seqs and phages               | 2.71  | Up   |
| RV2356C | PPE   | PE/PPE                                  | 1.88  | Up   |
| RV2368C | phoH  | intermediary metabolism and respiration | 1.55  | Up   |
| RV2369C |       | unknown                                 | 2.33  | Down |
| RV2370C |       | conserved hypotheticals                 | 3.22  | Up   |
| RV2371  | PE    | PE/PPE                                  | 2.82  | Down |
| RV2384  | mbtA  | lipid metabolism                        | 2.03  | Up   |
| RV2385  | lipK  | intermediary metabolism and respiration | 2.29  | Up   |
| RV2390C |       | conserved hypotheticals                 | 1.82  | Up   |
| RV2391  | nirA  | intermediary metabolism and respiration | 2.48  | Down |
| RV2392  | cysH  | intermediary metabolism and respiration | 2.24  | Down |
| RV2394  | ggtB  | intermediary metabolism and respiration | 2.42  | Up   |
| RV2395  |       | cell wall and cell processes            | 2.35  | Up   |

|         |         |                                         |       |      |
|---------|---------|-----------------------------------------|-------|------|
| RV2396  | PE_PGRS | PE/PPE                                  | 1.89  | Down |
| RV2398C | cysW    | cell wall and cell processes            | 2.36  | Up   |
| RV2406C |         | conserved hypotheticals                 | 2.34  | Down |
| RV2408  | PE      | PE/PPE                                  | 2.25  | Up   |
| RV2413C |         | conserved hypotheticals                 | 1.89  | Up   |
| RV2415C |         | conserved hypotheticals                 | 3.58  | Up   |
| RV2419C |         | intermediary metabolism and respiration | 1.83  | Up   |
| RV2420C |         | conserved hypotheticals                 | 2.58  | Up   |
| RV2421C |         | conserved hypotheticals                 | 2.35  | Up   |
| RV2423  |         | unknown                                 | 2.88  | Up   |
| RV2424C |         | insertion seqs and phages               | 2.37  | Up   |
| RV2428  | ahpC    | virulence, detoxification, adaptation   | 5.98  | Up   |
| RV2432C |         | unknown                                 | 3.55  | Down |
| RV2439C | proB    | intermediary metabolism and respiration | 2.93  | Up   |
| RV2440C | obg     | intermediary metabolism and respiration | 1.78  | Down |
| RV2442C | rplU    | information pathways                    | 1.91  | Down |
| RV2444C | rne     | intermediary metabolism and respiration | 4.77  | Down |
| RV2445C | ndkA    | intermediary metabolism and respiration | 1.89  | Up   |
| RV2446C |         | unknown                                 | 5.02  | Down |
| RV2447C | folC    | intermediary metabolism and respiration | 2.28  | Up   |
| RV2451  |         | unknown                                 | 2     | Up   |
| RV2452C |         | unknown                                 | 2.03  | Up   |
| RV2457C | clpX    | intermediary metabolism and respiration | 2.48  | Down |
| RV2461C | clpP    | intermediary metabolism and respiration | 1.51  | Down |
| RV2467  | pepD    | intermediary metabolism and respiration | 1.91  | Up   |
| RV2478C |         | unknown                                 | 1.9   | Up   |
| RV2479C |         | insertion seqs and phages               | 2.98  | Up   |
| RV2481C |         | unknown                                 | 1.97  | Up   |
| RV2485C | lipQ    | intermediary metabolism and respiration | 2.26  | Up   |
| RV2486  | echA14  | lipid metabolism                        | 1.98  | Up   |
| RV2488C |         | regulatory proteins                     | 2.97  | Up   |
| RV2489C |         | unknown                                 | 3.59  | Up   |
| RV2490C | PE_PGRS | PE/PPE                                  | 18.38 | Down |
| RV2491  |         | unknown                                 | 3.67  | Up   |
| RV2492  |         | unknown                                 | 2.42  | Up   |
| RV2495C | pdhC    | intermediary metabolism and respiration | 1.79  | Up   |
| RV2499C |         | intermediary metabolism and respiration | 1.71  | Up   |
| RV2510C |         | conserved hypotheticals                 | 2     | Up   |
| RV2513  |         | unknown                                 | 2.9   | Up   |
| RV2518C | lppS    | cell wall and cell processes            | 2.25  | Up   |
| RV2523C | acpS    | lipid metabolism                        | 2.25  | Up   |
| RV2524C | fas     | lipid metabolism                        | 4.04  | Down |
| RV2529  |         | unknown                                 | 2.23  | Up   |
| RV2533C | nusB    | information pathways                    | 1.71  | Up   |
| RV2540C | aroF    | intermediary metabolism and respiration | 2.11  | Up   |
| RV2541  |         | unknown                                 | 2.45  | Up   |
| RV2543  | lppA    | cell wall and cell processes            | 3.06  | Up   |
| RV2544  | lppB    | cell wall and cell processes            | 2.89  | Up   |
| RV2545  |         | conserved hypotheticals                 | 3.06  | Up   |

|         |         |                                         |       |      |
|---------|---------|-----------------------------------------|-------|------|
| RV2548  |         | conserved hypotheticals                 | 2.92  | Up   |
| RV2553C |         | unknown                                 | 2.39  | Down |
| RV2559C |         | conserved hypotheticals                 | 2.7   | Up   |
| RV2560  |         | cell wall and cell processes            | 2.69  | Up   |
| RV2561  |         | unknown                                 | 2.25  | Up   |
| RV2562  |         | unknown                                 | 2.66  | Up   |
| RV2566  |         | unknown                                 | 2.72  | Up   |
| RV2567  |         | conserved hypotheticals                 | 2.63  | Up   |
| RV2568C |         | conserved hypotheticals                 | 2.98  | Up   |
| RV2569C |         | conserved hypotheticals                 | 2.47  | Up   |
| RV2570  |         | unknown                                 | 2.54  | Up   |
| RV2571C |         | conserved hypotheticals                 | 2.12  | Up   |
| RV2575  |         | conserved hypotheticals                 | 2.38  | Up   |
| RV2576C |         | unknown                                 | 3.78  | Down |
| RV2577  |         | unknown                                 | 2.46  | Up   |
| RV2579  | linB    | intermediary metabolism and respiration | 2.95  | Up   |
| RV2584C | apt     | intermediary metabolism and respiration | 2.92  | Down |
| RV2591  | PE_PGRS | PE/PPE                                  | 20.16 | Down |
| RV2593C | ruvA    | information pathways                    | 2.03  | Up   |
| RV2594C | ruvC    | information pathways                    | 4.72  | Down |
| RV2603C |         | conserved hypotheticals                 | 1.76  | Up   |
| RV2617C |         | unknown                                 | 1.8   | Up   |
| RV2622  |         | intermediary metabolism and respiration | 1.91  | Up   |
| RV2623  |         | conserved hypotheticals                 | 7.02  | Down |
| RV2625C |         | conserved hypotheticals                 | 9.43  | Down |
| RV2626C |         | conserved hypotheticals                 | 6.69  | Down |
| RV2628  |         | unknown                                 | 3     | Down |
| RV2629  |         | unknown                                 | 2.57  | Down |
| RV2630  |         | unknown                                 | 2.29  | Down |
| RV2636  |         | unknown                                 | 3.85  | Up   |
| RV2637  | dedA    | conserved hypotheticals                 | 2.42  | Up   |
| RV2638  |         | conserved hypotheticals                 | 2.84  | Up   |
| RV2640C |         | regulatory proteins                     | 1.58  | Up   |
| RV2646  |         | insertion seqs and phages               | 2.23  | Up   |
| RV2653C |         | insertion seqs and phages               | 2.8   | Up   |
| RV2654C |         | insertion seqs and phages               | 2.66  | Up   |
| RV2655C |         | insertion seqs and phages               | 3.42  | Up   |
| RV2656C |         | insertion seqs and phages               | 2.09  | Up   |
| RV2658C |         | insertion seqs and phages               | 3.86  | Up   |
| RV2659C |         | insertion seqs and phages               | 1.93  | Up   |
| RV2660C |         | unknown                                 | 2.76  | Up   |
| RV2661C |         | unknown                                 | 2.57  | Up   |
| RV2662  |         | unknown                                 | 2.7   | Up   |
| RV2667  | clpX'   | intermediary metabolism and respiration | 2.45  | Up   |
| RV2669  |         | regulatory proteins                     | 2.05  | Up   |
| RV2670C |         | conserved hypotheticals                 | 3.33  | Up   |
| RV2671  | ribD    | intermediary metabolism and respiration | 1.78  | Up   |
| RV2676C |         | conserved hypotheticals                 | 1.96  | Up   |
| RV2681  |         | conserved hypotheticals                 | 2.13  | Up   |

|         |         |                                         |       |      |
|---------|---------|-----------------------------------------|-------|------|
| RV2684  | arsA    | cell wall and cell processes            | 2.69  | Up   |
| RV2685  | arsB    | cell wall and cell processes            | 1.97  | Up   |
| RV2686C |         | cell wall and cell processes            | 2.62  | Up   |
| RV2687C |         | unknown                                 | 2.49  | Up   |
| RV2710  | sigB    | information pathways                    | 7.07  | Down |
| RV2712C |         | unknown                                 | 2.23  | Up   |
| RV2716  |         | conserved hypotheticals                 | 2.18  | Down |
| RV2721C |         | conserved hypotheticals                 | 3.85  | Down |
| RV2728C |         | conserved hypotheticals                 | 1.81  | Up   |
| RV2730  |         | unknown                                 | 3.49  | Up   |
| RV2732C |         | conserved hypotheticals                 | 1.54  | Up   |
| RV2743C |         | conserved hypotheticals                 | 4.99  | Down |
| RV2745C |         | regulatory proteins                     | 6.72  | Down |
| RV2750  |         | intermediary metabolism and respiration | 2.44  | Up   |
| RV2756C | hsdM    | information pathways                    | 2.71  | Up   |
| RV2758C |         | conserved hypotheticals                 | 2.01  | Up   |
| RV2760C |         | conserved hypotheticals                 | 3.55  | Up   |
| RV2761C |         | unknown                                 | 2.15  | Down |
| RV2774C |         | unknown                                 | 2.9   | Up   |
| RV2780  | ald     | intermediary metabolism and respiration | 2.76  | Down |
| RV2797C |         | conserved hypotheticals                 | 2.14  | Up   |
| RV2798C |         | conserved hypotheticals                 | 1.79  | Up   |
| RV2799  |         | unknown                                 | 2.45  | Up   |
| RV2800  |         | conserved hypotheticals                 | 1.9   | Up   |
| RV2803C |         | unknown                                 | 2.9   | Up   |
| RV2804C |         | unknown                                 | 2.26  | Up   |
| RV2805  |         | conserved hypotheticals                 | 2.61  | Up   |
| RV2807  |         | conserved hypotheticals                 | 2     | Up   |
| RV2811  |         | conserved hypotheticals                 | 4.02  | Down |
| RV2823C |         | conserved hypotheticals                 | 2.01  | Up   |
| RV2825C |         | conserved hypotheticals                 | 2.11  | Up   |
| RV2831  | echA16  | lipid metabolism                        | 1.84  | Up   |
| RV2834C | ugpE    | cell wall and cell processes            | 2.16  | Up   |
| RV2836C | dinF    | information pathways                    | 2.21  | Down |
| RV2838C | rbfA    | information pathways                    | 2.83  | Down |
| RV2840C |         | conserved hypotheticals                 | 14.39 | Down |
| RV2845C | proS    | information pathways                    | 1.76  | Up   |
| RV2846C | efpA    | cell wall and cell processes            | 4.41  | Down |
| RV2851C |         | conserved hypotheticals                 | 2.08  | Up   |
| RV2853  | PE_PGRS | PE/PPE                                  | 2.57  | Up   |
| RV2854  |         | unknown                                 | 2.56  | Up   |
| RV2856  | nicT    | cell wall and cell processes            | 2.33  | Up   |
| RV2862C |         | conserved hypotheticals                 | 4.52  | Down |
| RV2864C |         | cell wall and cell processes            | 1.79  | Up   |
| RV2866  |         | conserved hypotheticals                 | 2.79  | Up   |
| RV2871  |         | conserved hypotheticals                 | 1.73  | Up   |
| RV2873  | mpt83   | cell wall and cell processes            | 2.34  | Up   |
| RV2874  |         | cell wall and cell processes            | 2.4   | Up   |
| RV2875  | mpt70   | cell wall and cell processes            | 2.43  | Up   |

|         |        |                                         |       |      |
|---------|--------|-----------------------------------------|-------|------|
| RV2877C |        | cell wall and cell processes            | 2.01  | Up   |
| RV2886C |        | insertion seqs and phages               | 2.21  | Down |
| RV2891  |        | unknown                                 | 2.43  | Up   |
| RV2892C | PPE    | PE/PPE                                  | 2.01  | Up   |
| RV2893  |        | intermediary metabolism and respiration | 2.94  | Up   |
| RV2895C | viuB   | intermediary metabolism and respiration | 2.73  | Up   |
| RV2896C |        | conserved hypotheticals                 | 2.83  | Up   |
| RV2897C |        | conserved hypotheticals                 | 3.03  | Up   |
| RV2898C |        | conserved hypotheticals                 | 2.67  | Up   |
| RV2899C | fdhD   | intermediary metabolism and respiration | 2.37  | Up   |
| RV2901C |        | unknown                                 | 2.07  | Down |
| RV2902C | rnhB   | intermediary metabolism and respiration | 2.15  | Down |
| RV2907C | rimM   | information pathways                    | 2.05  | Up   |
| RV2917  |        | conserved hypotheticals                 | 3.36  | Up   |
| RV2920C | amt    | cell wall and cell processes            | 1.96  | Up   |
| RV2922C | smc    | cell wall and cell processes            | 1.83  | Up   |
| RV2923C |        | conserved hypotheticals                 | 2.44  | Up   |
| RV2924C | fpg    | information pathways                    | 3.21  | Up   |
| RV2927C |        | conserved hypotheticals                 | 1.57  | Down |
| RV2928  | tesA   | lipid metabolism                        | 2.65  | Up   |
| RV2930  | fadD26 | lipid metabolism                        | 2.43  | Down |
| RV2932  | ppsB   | lipid metabolism                        | 1.73  | Up   |
| RV2934  | ppsD   | lipid metabolism                        | 2.19  | Up   |
| RV2935  | ppsE   | lipid metabolism                        | 15.35 | Down |
| RV2938  | drrC   | cell wall and cell processes            | 2.13  | Up   |
| RV2940C | mas    | lipid metabolism                        | 2.57  | Down |
| RV2943  |        | insertion seqs and phages               | 2.04  | Up   |
| RV2960C |        | unknown                                 | 1.92  | Up   |
| RV2962C |        | intermediary metabolism and respiration | 2.9   | Up   |
| RV2963  |        | cell wall and cell processes            | 2.47  | Up   |
| RV2965C | kdtB   | cell wall and cell processes            | 2.41  | Up   |
| RV2972C |        | unknown                                 | 3.05  | Up   |
| RV2973C | recG   | information pathways                    | 2.89  | Up   |
| RV2975C |        | conserved hypotheticals                 | 3.32  | Up   |
| RV2980  |        | unknown                                 | 2.08  | Up   |
| RV2983  |        | conserved hypotheticals                 | 2.4   | Up   |
| RV2986C | hupB   | information pathways                    | 3.4   | Down |
| RV2988C | leuC   | intermediary metabolism and respiration | 6.79  | Down |
| RV2989  |        | regulatory proteins                     | 2.11  | Down |
| RV2990C |        | unknown                                 | 1.91  | Down |
| RV2991  |        | conserved hypotheticals                 | 2.35  | Up   |
| RV2992C | gltS   | information pathways                    | 2.43  | Up   |
| RV2995C | leuB   | intermediary metabolism and respiration | 3.39  | Up   |
| RV2997  |        | intermediary metabolism and respiration | 2.57  | Up   |
| RV2998  |        | unknown                                 | 2.51  | Up   |
| RV2999  | lppY   | cell wall and cell processes            | 2.96  | Up   |
| RV3000  |        | conserved hypotheticals                 | 3.62  | Up   |
| RV3007C |        | unknown                                 | 1.72  | Up   |
| RV3011C | gatA   | information pathways                    | 3.07  | Up   |

|         |        |                                         |      |      |
|---------|--------|-----------------------------------------|------|------|
| RV3012C | gatC   | information pathways                    | 2.23 | Up   |
| RV3015C |        | conserved hypotheticals                 | 2.81 | Up   |
| RV3016  | lpqA   | cell wall and cell processes            | 2.94 | Up   |
| RV3018C | PPE    | PE/PPE                                  | 3.25 | Up   |
| RV3019C |        | cell wall and cell processes            | 1.59 | Down |
| RV3020C | PE     | PE/PPE                                  | 2.05 | Down |
| RV3021C | PPE    | PE/PPE                                  | 3.26 | Up   |
| RV3027C |        | unknown                                 | 2.45 | Up   |
| RV3031  |        | conserved hypotheticals                 | 2.09 | Up   |
| RV3032  |        | conserved hypotheticals                 | 2.2  | Up   |
| RV3033  |        | unknown                                 | 1.79 | Up   |
| RV3034C |        | conserved hypotheticals                 | 1.8  | Up   |
| RV3039C | echA17 | lipid metabolism                        | 2.57 | Up   |
| RV3040C |        | unknown                                 | 2.25 | Up   |
| RV3048C | nrdG   | intermediary metabolism and respiration | 3.93 | Up   |
| RV3049C |        | intermediary metabolism and respiration | 2.77 | Down |
| RV3050C |        | regulatory proteins                     | 2.25 | Down |
| RV3053C | nrdH   | intermediary metabolism and respiration | 6.71 | Down |
| RV3055  |        | regulatory proteins                     | 2.64 | Up   |
| RV3057C |        | intermediary metabolism and respiration | 1.98 | Up   |
| RV3059  |        | intermediary metabolism and respiration | 2.5  | Up   |
| RV3062  | ligB   | information pathways                    | 2.5  | Up   |
| RV3064C |        | conserved hypotheticals                 | 2.75 | Up   |
| RV3066  |        | regulatory proteins                     | 2.25 | Up   |
| RV3067  |        | conserved hypotheticals                 | 2.26 | Up   |
| RV3068C | pgmA   | intermediary metabolism and respiration | 2.1  | Up   |
| RV3070  |        | cell wall and cell processes            | 2.99 | Up   |
| RV3083  |        | intermediary metabolism and respiration | 5.93 | Down |
| RV3084  | lipR   | intermediary metabolism and respiration | 2.62 | Down |
| RV3090  |        | unknown                                 | 2.05 | Up   |
| RV3094C |        | conserved hypotheticals                 | 1.54 | Down |
| RV3096  |        | unknown                                 | 1.89 | Up   |
| RV3101C | ftsX   | cell wall and cell processes            | 1.61 | Down |
| RV3108  |        | unknown                                 | 2.09 | Up   |
| RV3109  | moaA   | intermediary metabolism and respiration | 2.56 | Up   |
| RV3110  | moaB   | intermediary metabolism and respiration | 3.25 | Up   |
| RV3112  | moaD   | intermediary metabolism and respiration | 3.24 | Up   |
| RV3113  |        | unknown                                 | 4.6  | Up   |
| RV3114  |        | unknown                                 | 3.48 | Up   |
| RV3119  | moaE   | intermediary metabolism and respiration | 2.89 | Up   |
| RV3124  |        | regulatory proteins                     | 2.72 | Up   |
| RV3127  |        | conserved hypotheticals                 | 4.78 | Down |
| RV3129  |        | conserved hypotheticals                 | 4.34 | Up   |
| RV3130C |        | conserved hypotheticals                 | 6.46 | Down |
| RV3131  |        | conserved hypotheticals                 | 10.8 | Down |
| RV3134C |        | conserved hypotheticals                 | 2.2  | Down |
| RV3138  | pflA   | intermediary metabolism and respiration | 1.91 | Up   |
| RV3142C |        | unknown                                 | 1.95 | Down |
| RV3145  | nuoA   | intermediary metabolism and respiration | 2.1  | Down |

|         |       |                                         |       |      |
|---------|-------|-----------------------------------------|-------|------|
| RV3149  | nuoE  | intermediary metabolism and respiration | 2.97  | Down |
| RV3155  | nuoK  | intermediary metabolism and respiration | 1.74  | Down |
| RV3158  | nuoN  | intermediary metabolism and respiration | 1.66  | Up   |
| RV3160C |       | regulatory proteins                     | 1.86  | Down |
| RV3161C |       | intermediary metabolism and respiration | 2.52  | Down |
| RV3162C |       | cell wall and cell processes            | 1.92  | Down |
| RV3165C |       | unknown                                 | 3.03  | Up   |
| RV3181C |       | conserved hypotheticals                 | 2.47  | Up   |
| RV3182  |       | conserved hypotheticals                 | 1.67  | Up   |
| RV3187  |       | insertion seqs and phages               | 3.06  | Up   |
| RV3189  |       | conserved hypotheticals                 | 2.1   | Up   |
| RV3190C |       | unknown                                 | 1.8   | Up   |
| RV3191C |       | insertion seqs and phages               | 2.75  | Up   |
| RV3194C |       | conserved hypotheticals                 | 1.74  | Up   |
| RV3197  |       | cell wall and cell processes            | 4.71  | Down |
| RV3204  |       | intermediary metabolism and respiration | 1.8   | Up   |
| RV3210C |       | unknown                                 | 2.22  | Up   |
| RV3211  | rhIE  | information pathways                    | 1.8   | Down |
| RV3212  |       | unknown                                 | 2.15  | Down |
| RV3214  | entD  | intermediary metabolism and respiration | 2.27  | Up   |
| RV3215  | entC  | intermediary metabolism and respiration | 2.31  | Up   |
| RV3216  |       | intermediary metabolism and respiration | 1.5   | Up   |
| RV3218  |       | conserved hypotheticals                 | 2.59  | Up   |
| RV3220C |       | regulatory proteins                     | 2.93  | Down |
| RV3223C | sigH  | information pathways                    | 4.27  | Up   |
| RV3224  |       | intermediary metabolism and respiration | 2.51  | Down |
| RV3228  |       | conserved hypotheticals                 | 1.59  | Up   |
| RV3229C | desA3 | lipid metabolism                        | 2.81  | Up   |
| RV3231C |       | unknown                                 | 2.59  | Up   |
| RV3232C |       | conserved hypotheticals                 | 1.64  | Up   |
| RV3233C |       | conserved hypotheticals                 | 2     | Up   |
| RV3235  |       | unknown                                 | 2.2   | Up   |
| RV3239C |       | cell wall and cell processes            | 2.16  | Up   |
| RV3249C |       | regulatory proteins                     | 7.7   | Down |
| RV3250C | rubB  | intermediary metabolism and respiration | 12.22 | Down |
| RV3251C | rubA  | intermediary metabolism and respiration | 6.22  | Down |
| RV3252C |       | intermediary metabolism and respiration | 14.93 | Down |
| RV3253C |       | cell wall and cell processes            | 1.75  | Up   |
| RV3255C | manA  | intermediary metabolism and respiration | 2.14  | Up   |
| RV3259  |       | unknown                                 | 2.71  | Up   |
| RV3265C | wbbL  | intermediary metabolism and respiration | 1.66  | Up   |
| RV3266C | rmlD  | intermediary metabolism and respiration | 2.87  | Up   |
| RV3275C | purE  | intermediary metabolism and respiration | 2.35  | Up   |
| RV3279C | birA  | intermediary metabolism and respiration | 3.53  | Up   |
| RV3281  |       | conserved hypotheticals                 | 2.3   | Down |
| RV3283  | sseA  | intermediary metabolism and respiration | 2.25  | Down |
| RV3287C | rsbW  | information pathways                    | 1.65  | Down |
| RV3290C | lat   | intermediary metabolism and respiration | 4.2   | Down |
| RV3294  |       | unknown                                 | 1.81  | Up   |

|         |         |                                         |      |      |
|---------|---------|-----------------------------------------|------|------|
| RV3295  |         | regulatory proteins                     | 2.13 | Down |
| RV3299C | atsB    | intermediary metabolism and respiration | 1.92 | Up   |
| RV3302C | glpD2   | intermediary metabolism and respiration | 2.32 | Up   |
| RV3309C | upp     | intermediary metabolism and respiration | 2.91 | Up   |
| RV3311  |         | conserved hypotheticals                 | 2.71 | Up   |
| RV3312C |         | conserved hypotheticals                 | 3.19 | Up   |
| RV3314C | deoA    | intermediary metabolism and respiration | 2.95 | Up   |
| RV3324C | moaC3   | intermediary metabolism and respiration | 3.36 | Up   |
| RV3326  |         | insertion seqs and phages               | 3.56 | Up   |
| RV3327  |         | insertion seqs and phages               | 2.8  | Up   |
| RV3329  |         | intermediary metabolism and respiration | 2.93 | Up   |
| RV3330  |         | cell wall and cell processes            | 2.11 | Up   |
| RV3331  | sugI    | cell wall and cell processes            | 1.57 | Up   |
| RV3333C |         | unknown                                 | 3.55 | Up   |
| RV3336C | trpS    | information pathways                    | 2.92 | Up   |
| RV3339C | icd1    | intermediary metabolism and respiration | 1.79 | Up   |
| RV3343C | PPE     | PE/PPE                                  | 3.46 | Up   |
| RV3347C | PPE     | PE/PPE                                  | 1.69 | Up   |
| RV3350C | PPE     | PE/PPE                                  | 3.74 | Up   |
| RV3351C |         | conserved hypotheticals                 | 3.66 | Up   |
| RV3352C |         | intermediary metabolism and respiration | 3.55 | Up   |
| RV3353C |         | conserved hypotheticals                 | 3.42 | Up   |
| RV3354  |         | conserved hypotheticals                 | 2.77 | Up   |
| RV3355C |         | conserved hypotheticals                 | 2.38 | Up   |
| RV3357  |         | conserved hypotheticals                 | 3.54 | Up   |
| RV3358  |         | unknown                                 | 3.34 | Up   |
| RV3359  |         | intermediary metabolism and respiration | 2.86 | Up   |
| RV3360  |         | cell wall and cell processes            | 2.65 | Up   |
| RV3362C |         | unknown                                 | 2.11 | Up   |
| RV3363C |         | unknown                                 | 1.95 | Up   |
| RV3366  | spoU    | information pathways                    | 2.87 | Up   |
| RV3370C | dnaE2   | information pathways                    | 2.69 | Up   |
| RV3372  | otsB2   | virulence, detoxification, adaptation   | 1.94 | Up   |
| RV3374  | echA18' | lipid metabolism                        | 3.59 | Up   |
| RV3377C |         | intermediary metabolism and respiration | 1.76 | Up   |
| RV3378C |         | unknown                                 | 3    | Up   |
| RV3379C |         | intermediary metabolism and respiration | 2.22 | Up   |
| RV3380C |         | insertion seqs and phages               | 3.35 | Up   |
| RV3383C | idsB    | intermediary metabolism and respiration | 2.23 | Up   |
| RV3384C |         | conserved hypotheticals                 | 3    | Up   |
| RV3387  |         | insertion seqs and phages               | 2.48 | Up   |
| RV3388  | PE_PGRS | PE/PPE                                  | 5.27 | Down |
| RV3391  | acrA1   | lipid metabolism                        | 1.96 | Up   |
| RV3392C | cmaA1   | lipid metabolism                        | 2.02 | Up   |
| RV3395C |         | unknown                                 | 2.46 | Up   |
| RV3398C | idsA    | intermediary metabolism and respiration | 2.84 | Up   |
| RV3399  |         | conserved hypotheticals                 | 3.33 | Up   |
| RV3400  |         | intermediary metabolism and respiration | 2.33 | Up   |
| RV3402C |         | cell wall and cell processes            | 3.48 | Down |



|         |         |                                         |       |      |
|---------|---------|-----------------------------------------|-------|------|
| RV3404C |         | unknown                                 | 1.8   | Up   |
| RV3406  |         | intermediary metabolism and respiration | 3.3   | Up   |
| RV3407  |         | conserved hypotheticals                 | 8.9   | Down |
| RV3408  |         | conserved hypotheticals                 | 7.03  | Down |
| RV3411C | guaB2   | intermediary metabolism and respiration | 4.73  | Down |
| RV3412  |         | conserved hypotheticals                 | 2.46  | Down |
| RV3415C |         | conserved hypotheticals                 | 2.28  | Up   |
| RV3417C | groEL1  | virulence, detoxification, adaptation   | 7.18  | Down |
| RV3421C |         | conserved hypotheticals                 | 3.49  | Down |
| RV3430C |         | insertion seqs and phages               | 2.53  | Up   |
| RV3431C |         | insertion seqs and phages               | 2.87  | Up   |
| RV3436C | glmS    | intermediary metabolism and respiration | 1.6   | Up   |
| RV3444C |         | conserved hypotheticals                 | 2.77  | Up   |
| RV3446C |         | unknown                                 | 3.27  | Up   |
| RV3447C |         | cell wall and cell processes            | 2.77  | Up   |
| RV3448  |         | cell wall and cell processes            | 3.78  | Up   |
| RV3449  |         | cell wall and cell processes            | 1.76  | Up   |
| RV3452  |         | cell wall and cell processes            | 2.53  | Up   |
| RV3453  |         | unknown                                 | 2.58  | Up   |
| RV3454  |         | cell wall and cell processes            | 2.96  | Up   |
| RV3458C | rpsD    | information pathways                    | 3.28  | Down |
| RV3459C | rpsK    | information pathways                    | 6.91  | Down |
| RV3468C | rmlB3   | intermediary metabolism and respiration | 3.1   | Up   |
| RV3469C | mhpE    | intermediary metabolism and respiration | 2.47  | Up   |
| RV3470C | ilvB2   | intermediary metabolism and respiration | 2.62  | Up   |
| RV3471C |         | conserved hypotheticals                 | 3.73  | Up   |
| RV3472  |         | lipid metabolism                        | 1.64  | Up   |
| RV3473C | bpoA    | virulence, detoxification, adaptation   | 3.58  | Up   |
| RV3475  |         | insertion seqs and phages               | 3.77  | Up   |
| RV3476C | kgtP    | cell wall and cell processes            | 3.36  | Up   |
| RV3477  | PE      | PE/PPE                                  | 6.45  | Down |
| RV3478  | PPE     | PE/PPE                                  | 12.63 | Down |
| RV3479  |         | unknown                                 | 1.65  | Up   |
| RV3480C |         | conserved hypotheticals                 | 2.53  | Up   |
| RV3487C | lipF    | intermediary metabolism and respiration | 19.26 | Down |
| RV3489  |         | unknown                                 | 4.32  | Down |
| RV3493C |         | unknown                                 | 2.04  | Up   |
| RV3494C |         | virulence, detoxification, adaptation   | 1.93  | Up   |
| RV3496C |         | virulence, detoxification, adaptation   | 1.81  | Up   |
| RV3498C |         | virulence, detoxification, adaptation   | 2.03  | Up   |
| RV3500C |         | virulence, detoxification, adaptation   | 2.33  | Up   |
| RV3501C |         | virulence, detoxification, adaptation   | 2.12  | Up   |
| RV3502C |         | intermediary metabolism and respiration | 2.89  | Up   |
| RV3508  | PE_PGRS | PE/PPE                                  | 31.42 | Down |
| RV3512  | PE_PGRS | PE/PPE                                  | 17.08 | Down |
| RV3517  |         | conserved hypotheticals                 | 2.24  | Up   |
| RV3528C |         | unknown                                 | 1.84  | Up   |
| RV3529C |         | conserved hypotheticals                 | 1.79  | Up   |
| RV3534C |         | intermediary metabolism and respiration | 2.6   | Up   |

|         |         |                                         |       |      |
|---------|---------|-----------------------------------------|-------|------|
| RV3537  |         | intermediary metabolism and respiration | 2.48  | Up   |
| RV3538  | ufaA2   | lipid metabolism                        | 2.27  | Up   |
| RV3541C |         | unknown                                 | 2.75  | Up   |
| RV3542C |         | unknown                                 | 2.23  | Up   |
| RV3543C | fadE29  | lipid metabolism                        | 2.63  | Up   |
| RV3544C | fadE28  | lipid metabolism                        | 2.4   | Up   |
| RV3545C |         | intermediary metabolism and respiration | 2.03  | Up   |
| RV3546  | fadA5   | lipid metabolism                        | 2.9   | Up   |
| RV3550  | echA20  | lipid metabolism                        | 1.65  | Up   |
| RV3552  |         | unknown                                 | 1.91  | Up   |
| RV3554  | fdxB    | intermediary metabolism and respiration | 2.36  | Down |
| RV3556C | fadA6   | lipid metabolism                        | 2.77  | Down |
| RV3559C |         | intermediary metabolism and respiration | 2.32  | Up   |
| RV3565  | aspB    | intermediary metabolism and respiration | 2.6   | Up   |
| RV3567C |         | intermediary metabolism and respiration | 2.52  | Up   |
| RV3569C |         | intermediary metabolism and respiration | 1.73  | Up   |
| RV3571  |         | intermediary metabolism and respiration | 2.51  | Up   |
| RV3572  |         | unknown                                 | 2.22  | Up   |
| RV3573C | fadE34  | lipid metabolism                        | 2.13  | Up   |
| RV3574  |         | regulatory proteins                     | 2.91  | Up   |
| RV3575C |         | regulatory proteins                     | 2.45  | Up   |
| RV3582C |         | conserved hypotheticals                 | 4.07  | Down |
| RV3583C |         | regulatory proteins                     | 7.59  | Down |
| RV3589  | mutY    | information pathways                    | 2.47  | Up   |
| RV3590C | PE_PGRS | PE/PPE                                  | 2     | Down |
| RV3591C |         | conserved hypotheticals                 | 3.07  | Up   |
| RV3593  | lpqF    | cell wall and cell processes            | 1.75  | Up   |
| RV3594  |         | unknown                                 | 2.16  | Up   |
| RV3595C | PE_PGRS | PE/PPE                                  | 4.69  | Down |
| RV3597C | lsr2    | conserved hypotheticals                 | 2.12  | Up   |
| RV3599C |         | unknown                                 | 2.17  | Up   |
| RV3611  |         | unknown                                 | 2.41  | Up   |
| RV3613C |         | unknown                                 | 4.29  | Down |
| RV3614C |         | conserved hypotheticals                 | 11.28 | Down |
| RV3615C |         | conserved hypotheticals                 | 15.1  | Down |
| RV3616C |         | conserved hypotheticals                 | 9.52  | Down |
| RV3619C |         | conserved hypotheticals                 | 11.17 | Down |
| RV3620C |         | conserved hypotheticals                 | 28.48 | Down |
| RV3621C | PPE     | PE/PPE                                  | 1.78  | Up   |
| RV3629C |         | cell wall and cell processes            | 2.38  | Down |
| RV3636  |         | insertion seqs and phages               | 2.38  | Up   |
| RV3639C |         | conserved hypotheticals                 | 2.09  | Up   |
| RV3641C | fic     | cell wall and cell processes            | 1.58  | Up   |
| RV3643  |         | unknown                                 | 2.98  | Up   |
| RV3644C |         | information pathways                    | 2.36  | Up   |
| RV3645  |         | cell wall and cell processes            | 1.84  | Up   |
| RV3648C | cspA    | virulence, detoxification, adaptation   | 6.41  | Down |
| RV3650  | PE      | PE/PPE                                  | 2.19  | Up   |
| RV3652  | PE_PGRS | PE/PPE                                  | 2.25  | Up   |

|         |         |                                         |       |      |
|---------|---------|-----------------------------------------|-------|------|
| RV3653  | PE_PGRS | PE/PPE                                  | 10.06 | Down |
| RV3654C |         | unknown                                 | 2.35  | Up   |
| RV3658C |         | cell wall and cell processes            | 2.08  | Up   |
| RV3659C | trbB    | cell wall and cell processes            | 3     | Up   |
| RV3664C | dppC    | cell wall and cell processes            | 3.04  | Up   |
| RV3670  | ephE    | virulence, detoxification, adaptation   | 3.58  | Up   |
| RV3676  |         | regulatory proteins                     | 2.37  | Up   |
| RV3682  | ponA'   | cell wall and cell processes            | 1.7   | Down |
| RV3685C |         | intermediary metabolism and respiration | 2.06  | Up   |
| RV3691  |         | unknown                                 | 2.32  | Up   |
| RV3693  |         | conserved hypotheticals                 | 2.29  | Up   |
| RV3695  |         | conserved hypotheticals                 | 2.79  | Up   |
| RV3696C | glpK    | intermediary metabolism and respiration | 3.05  | Up   |
| RV3700C |         | intermediary metabolism and respiration | 2.77  | Up   |
| RV3705C |         | unknown                                 | 1.63  | Up   |
| RV3706C |         | unknown                                 | 3.09  | Down |
| RV3709C | ask     | intermediary metabolism and respiration | 1.67  | Up   |
| RV3711C | dnaQ    | information pathways                    | 2.17  | Up   |
| RV3712  |         | conserved hypotheticals                 | 2.67  | Up   |
| RV3715C | recR    | information pathways                    | 2.51  | Up   |
| RV3720  |         | lipid metabolism                        | 2.16  | Up   |
| RV3723  |         | unknown                                 | 1.61  | Up   |
| RV3743C |         | cell wall and cell processes            | 2.99  | Up   |
| RV3745C |         | conserved hypotheticals                 | 2.13  | Up   |
| RV3746C | PE      | PE/PPE                                  | 2.35  | Up   |
| RV3749C |         | unknown                                 | 3.09  | Down |
| RV3751  |         | insertion seqs and phages               | 2.31  | Up   |
| RV3761C | fadE36  | lipid metabolism                        | 2.04  | Up   |
| RV3764C |         | regulatory proteins                     | 2.58  | Up   |
| RV3768  |         | unknown                                 | 3.06  | Up   |
| RV3771C |         | conserved hypotheticals                 | 1.67  | Up   |
| RV3772  | hisC2   | intermediary metabolism and respiration | 1.9   | Up   |
| RV3773C |         | conserved hypotheticals                 | 2.03  | Up   |
| RV3775  | lipE    | intermediary metabolism and respiration | 1.82  | Up   |
| RV3780  |         | unknown                                 | 1.83  | Up   |
| RV3781  |         | cell wall and cell processes            | 1.76  | Up   |
| RV3784  | epiB    | intermediary metabolism and respiration | 2.71  | Up   |
| RV3785  |         | unknown                                 | 2.35  | Up   |
| RV3786C |         | unknown                                 | 3.52  | Up   |
| RV3788  |         | unknown                                 | 2     | Up   |
| RV3790  |         | intermediary metabolism and respiration | 2.75  | Up   |
| RV3791  |         | intermediary metabolism and respiration | 2.58  | Up   |
| RV3792  |         | cell wall and cell processes            | 3.27  | Up   |
| RV3796  | atsH    | intermediary metabolism and respiration | 2.5   | Up   |
| RV3797  | fadE35  | lipid metabolism                        | 2.37  | Up   |
| RV3800C | pks13   | lipid metabolism                        | 5.07  | Down |
| RV3801C | fadD32  | lipid metabolism                        | 7.05  | Down |
| RV3803C | fbpC1   | lipid metabolism                        | 1.67  | Down |
| RV3804C | fbpA    | lipid metabolism                        | 17.36 | Down |

|         |       |                                         |       |      |
|---------|-------|-----------------------------------------|-------|------|
| RV3806C |       | cell wall and cell processes            | 2.1   | Up   |
| RV3809C | glf   | cell wall and cell processes            | 1.83  | Up   |
| RV3813C |       | conserved hypotheticals                 | 1.98  | Up   |
| RV3818  |       | unknown                                 | 2.38  | Down |
| RV3819  |       | unknown                                 | 1.63  | Up   |
| RV3822  |       | conserved hypotheticals                 | 4.73  | Down |
| RV3825C | pks2  | lipid metabolism                        | 1.7   | Down |
| RV3828C |       | insertion seqs and phages               | 2.62  | Down |
| RV3830C |       | regulatory proteins                     | 2.58  | Up   |
| RV3832C |       | unknown                                 | 2.2   | Up   |
| RV3834C | serS  | information pathways                    | 3.16  | Up   |
| RV3835  |       | unknown                                 | 1.78  | Down |
| RV3841  | bfrB  | intermediary metabolism and respiration | 32.32 | Down |
| RV3849  |       | unknown                                 | 5.44  | Down |
| RV3853  | menG  | intermediary metabolism and respiration | 2.14  | Up   |
| RV3860  |       | conserved hypotheticals                 | 2.03  | Up   |
| RV3861  |       | unknown                                 | 3.07  | Up   |
| RV3862C |       | unknown                                 | 2.06  | Up   |
| RV3863  |       | unknown                                 | 2.29  | Up   |
| RV3865  |       | conserved hypotheticals                 | 5.93  | Down |
| RV3867  |       | conserved hypotheticals                 | 4.94  | Down |
| RV3869  |       | conserved hypotheticals                 | 7.58  | Down |
| RV3870  |       | conserved hypotheticals                 | 4.2   | Down |
| RV3871  |       | conserved hypotheticals                 | 5.29  | Down |
| RV3872  | PE    | PE/PPE                                  | 4.81  | Down |
| RV3873  | PPE   | PE/PPE                                  | 5.28  | Down |
| RV3874  |       | conserved hypotheticals                 | 20.56 | Down |
| RV3875  | esat6 | cell wall and cell processes            | 23.87 | Down |
| RV3876  |       | conserved hypotheticals                 | 2.82  | Down |
| RV3879C |       | unknown                                 | 1.67  | Down |
| RV3880C |       | conserved hypotheticals                 | 1.51  | Down |
| RV3884C |       | conserved hypotheticals                 | 1.69  | Up   |
| RV3894C |       | cell wall and cell processes            | 2.54  | Up   |
| RV3901C |       | cell wall and cell processes            | 3.04  | Up   |
| RV3902C |       | unknown                                 | 3.06  | Up   |
| RV3903C |       | unknown                                 | 2.91  | Up   |
| RV3904C |       | unknown                                 | 1.91  | Up   |
| RV3907C | pcnA  | information pathways                    | 2.42  | Up   |
| RV3908  |       | conserved hypotheticals                 | 2.24  | Up   |
| RV3909  |       | conserved hypotheticals                 | 2.35  | Up   |
| RV3911  | sigM  | information pathways                    | 2.64  | Up   |
| RV3912  |       | unknown                                 | 1.9   | Up   |
| RV3914  | trxC  | intermediary metabolism and respiration | 2.16  | Down |
| RV3919C | gid   | cell wall and cell processes            | 3.4   | Down |
| RV3921C |       | cell wall and cell processes            | 9.06  | Down |
| RV3923C | mnpA  | intermediary metabolism and respiration | 4.35  | Down |
